# Supplementary material for: Rapid reconstruction of SARS-CoV-2 using a synthetic genomics platform
Source: Springer Nature journal article supplement (doi:10.1038/s41586-020-2294-9), 2020-05-04

Supplementary Fig. 1a | MHV-GFP

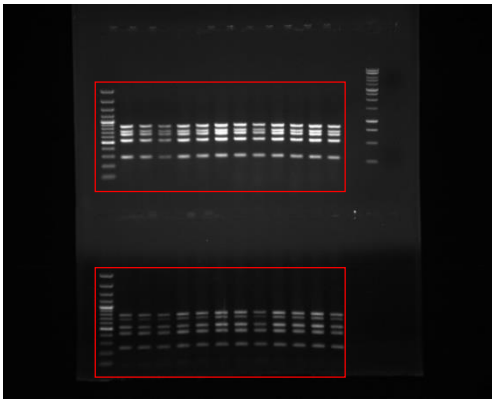

Supplementary Fig. 1b | MERS\_CoV

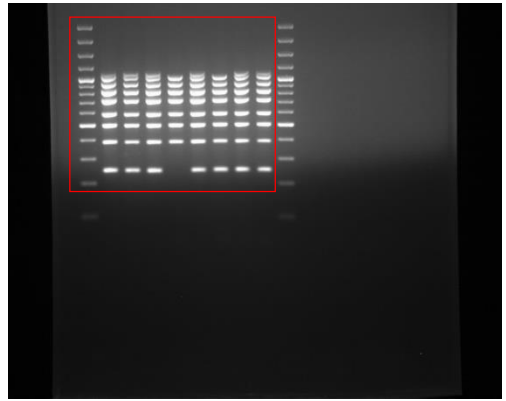

Supplementary Fig. 1c | MERS-CoV-GFP

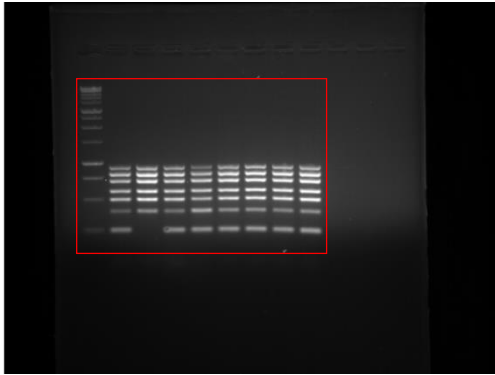

Supplementary Fig. 1c | MERS-CoV-GFP

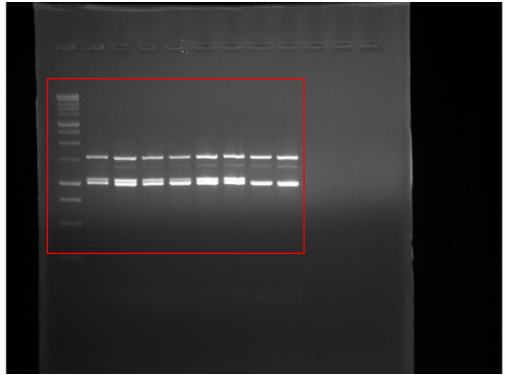

Supplementary Fig. 1d | HCoV-229E

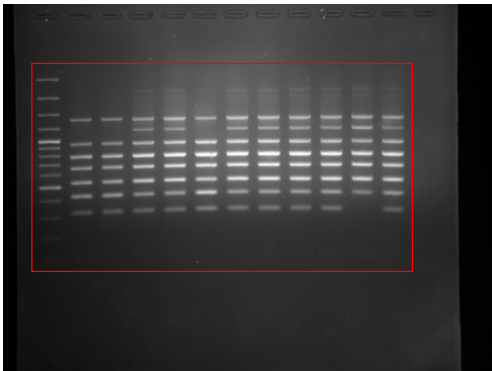

Supplementary Fig. 1d | HCoV-229E

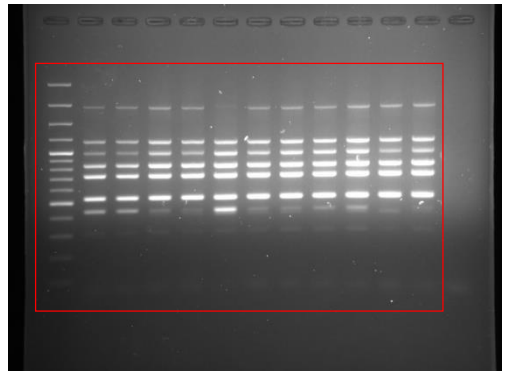

Supplementary Fig. 1e | HCoV-HKU1

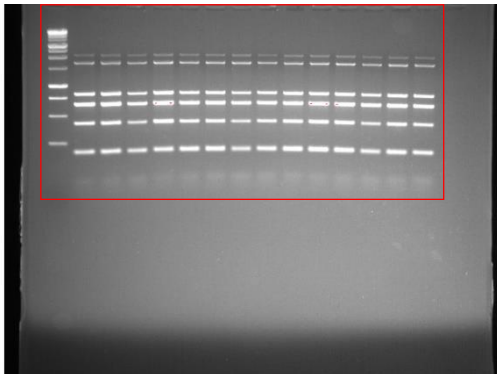

Supplementary Fig. 1e | HCoV-HKU1

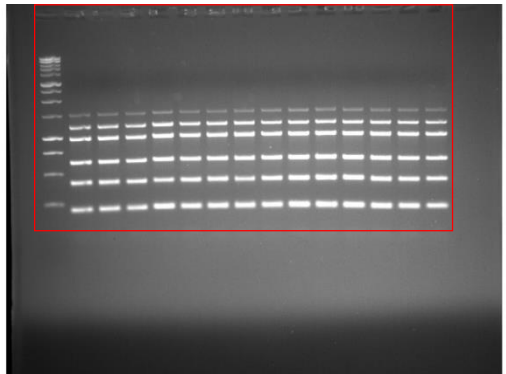

Supplementary Fig. 1f | MERS-CoV-Riyadh-1734-2015

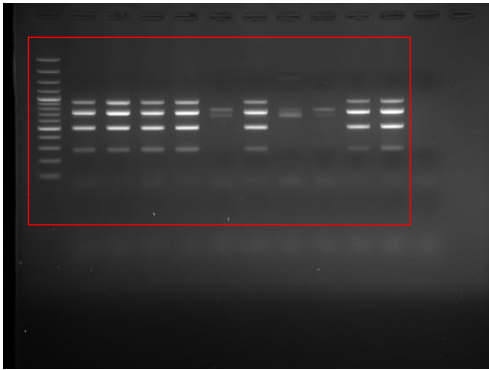

Supplementary Fig. 1f | MERS-CoV-Riyadh-1734-2015

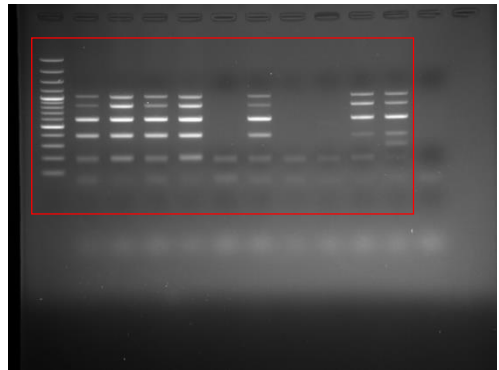

Supplementary Fig. 1g | ZIKA virus

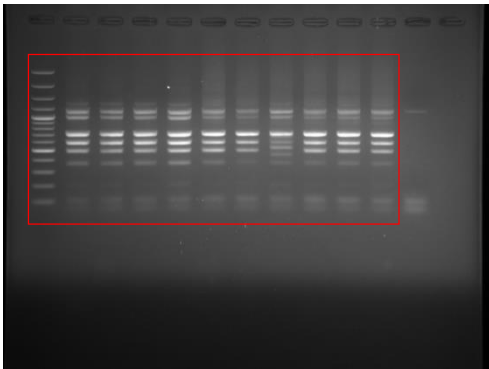

Supplementary Fig. 1h | hRSV-B

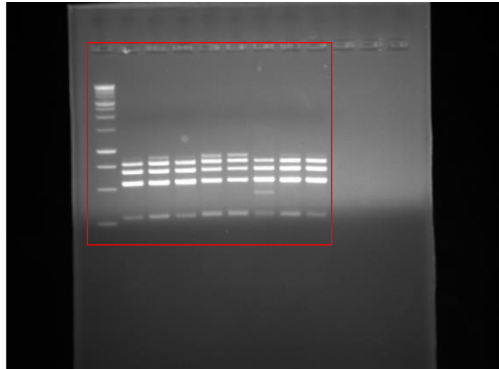

Supplementary Fig. 1i | SARS\_CoV-2

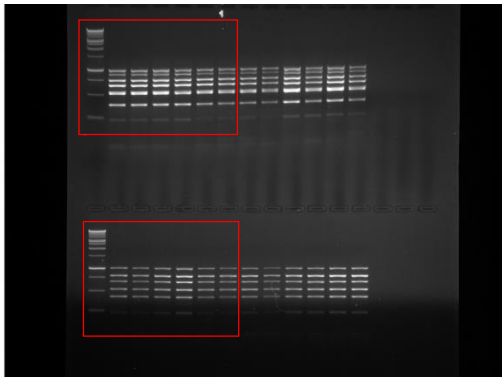

Supplementary Fig. 1j | SARS\_CoV-2-GFP

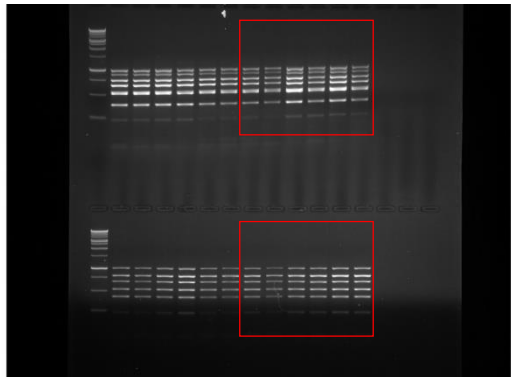

Supplementary Fig. 1j | SARS\_CoV-2-GFP

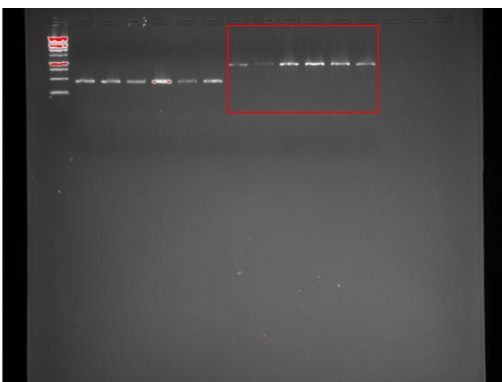

Extended Data Fig. 4a

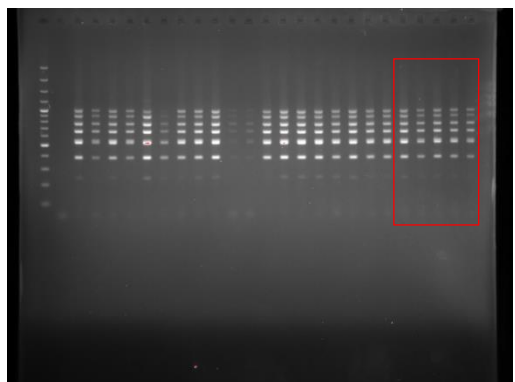

Extended Data Fig. 4a

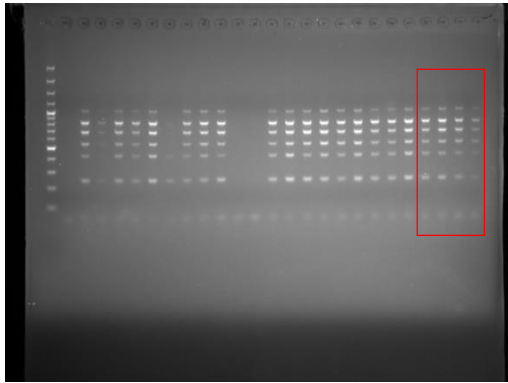

Extended Data Fig. 4a

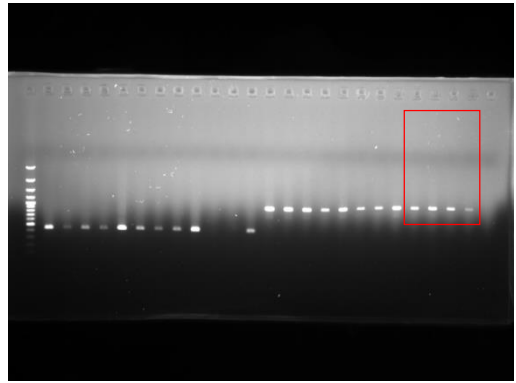

Extended Data Fig. 4b

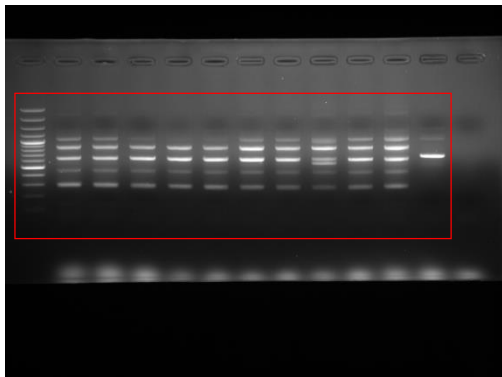

Extended Data Fig. 4c

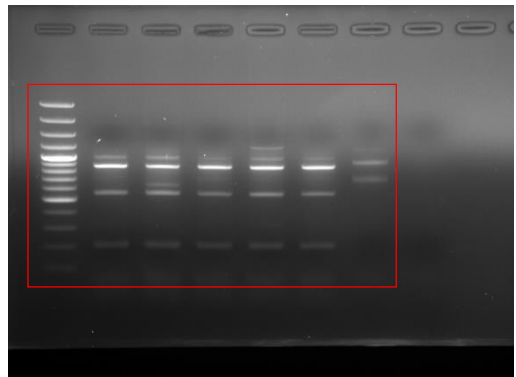

Supplement: 41586_2020_2294_MOESM4_ESM.pdf [file 41586_2020_2294_MOESM4_ESM.pdf]
