# Supplementary material for: Rapid reconstruction of SARS-CoV-2 using a synthetic genomics platform
Source: Springer Nature journal article supplement (doi:10.1038/s41586-020-2294-9), 2020-05-04
Supplement: 41586_2020_2294_MOESM1_ESM.pdf [file 41586_2020_2294_MOESM1_ESM.pdf]

---

**Supplementary information**

---

# **Rapid reconstruction of SARS-CoV-2 using a synthetic genomics platform**

---

In the format provided by the authors and unedited

Tran Thi Nhu Thao, Fabien Labrousseau, Nadine Ebert, Philip V'kovski, Hanspeter Stalder, Jasmine Portmann, Jenna Kelly, Silvio Steiner, Melle Holwerda, Annika Kratzel, Mitra Gultom, Kimberly Schmied, Laura Laloli, Linda Hüsser, Manon Wider, Stephanie Pfaender, Dagny Hirt, Valentina Cippà, Silvia Crespo-Pomar, Simon Schröder, Doreen Muth, Daniela Niemeyer, Victor M. Corman, Marcel A. Müller, Christian Drosten, Ronald Dijkman, Joerg Jores<sup>✉</sup> & Volker Thiel<sup>✉</sup>

## Supplementary information

Rapid reconstruction of SARS-CoV-2 using a synthetic genomics platform

Tran Thi Nhu Thao<sup>¶, 1,2,3</sup>, Fabien Labrousseau<sup>¶, 2,4</sup>, Nadine Ebert<sup>¶, 1,2</sup>, Philip V'kovski<sup>1,2</sup>, Hanspeter Stalder<sup>1,2</sup>, Jasmine Portmann<sup>1,2</sup>, Jenna Kelly<sup>1,2</sup>, Silvio Steiner<sup>1,2,3</sup>, Melle Holwerda<sup>1,2,3,5</sup>, Annika Kratzel<sup>1,2,3</sup>, Mitra Gultom<sup>1,2,3,5</sup>, Kimberly Schmied<sup>1,2</sup>, Laura Laloli<sup>1,2,3,5</sup>, Linda Hüsler<sup>1,2</sup>, Manon Wider<sup>5</sup>, Stephanie Pfaender<sup>1,2</sup>, Dagny Hirt<sup>1,2</sup>, Valentina Cippà<sup>2,4</sup>, Silvia Crespo-Pomar<sup>2,4</sup>, Simon Schröder<sup>6</sup>, Doreen Muth<sup>6,7</sup>, Daniela Niemeyer<sup>6,7</sup>, Victor Corman<sup>6,7</sup>, Marcel A. Müller<sup>6,7,8</sup>, Christian Drosten<sup>6,7</sup>, Ronald Dijkman<sup>1,2,5</sup>, Joerg Jores<sup>§,\*, 2,4</sup>, Volker Thiel<sup>§,\*, 1,2</sup>

<sup>1</sup>*Institute of Virology and Immunology (IVI), Bern, Switzerland*

<sup>2</sup>*Department of Infectious Diseases and Pathobiology, Vetsuisse Faculty, University of Bern, Bern, Switzerland*

<sup>3</sup>*Graduate School for Biomedical Science, University of Bern, Bern, Switzerland*

<sup>4</sup>*Institute of Veterinary Bacteriology, Vetsuisse Faculty, University of Bern, Bern, Switzerland*

<sup>5</sup>*Institute for Infectious Diseases, University of Bern, Bern, Switzerland*

<sup>6</sup>*Institute of Virology, Charité-Universitätsmedizin Berlin, corporate member of Freie Universität Berlin, Humboldt-Universität zu Berlin, and Berlin Institute of Health, Berlin, Germany*

<sup>7</sup>*German Centre for Infection Research, associated partner Charité, Berlin, Germany.*

<sup>8</sup>*Martsinovsky Institute of Medical Parasitology, Tropical and Vector Borne Diseases, Sechenov University, Moscow, Russia.*

¶, §: *equally contributed*

\**corresponding authors:*

*Volker Thiel; e-mail: [volker.thiel@vetsuisse.unibe.ch](mailto:volker.thiel@vetsuisse.unibe.ch); phone: +41-31-6312413*

*Joerg Jores; e-mail: [joerg.jores@vetsuisse.unibe.ch](mailto:joerg.jores@vetsuisse.unibe.ch); phone: +41-31-6312414*

## Table of Contents

- I. Supplementary Figure 1. Reconstruction of different viral genomes in yeast using TAR cloning
  - a, MHV-GFP
  - b, MERS-CoV
  - c, MERS-CoV-GFP
  - d, HCoV-229E
  - e, HCoV-HKU1
  - f, MERS-CoV-Riyadh-1734-2015
  - g, ZIKA virus
  - h, hRSV-B
  - i, SARS-CoV-2
  - j, SARS-CoV-2-GFP
- II. Supplementary Figure 2. Raw data of uncropped agarose gels
- III. Supplementary Data 1. Nucleotide sequences of synthetic DNA fragments used to reconstruct recombinant SARS-CoV-2 and SARS-CoV-2-GFP
- IV. Supplementary Table 1. List of primers used in this study

## **I. Supplementary Figure 1. Reconstruction of the different viral genomes in yeast using TAR cloning.**

Genome organisation of all viruses used in this study are schematically depicted. Overlapping DNA fragments used for TAR cloning to reconstruct the viral genomes in yeasts are presented. Agarose gels show correct genome reconstruction analysed by PCR.

**a,** Schematic representation of the MHV-GFP genome organisation and nine viral subgenomic fragments (F1-9) used for TAR cloning. Viral open reading frames (ORFs), the ORF for GFP and sequence elements at the 5'- and 3'-untranslated regions (UTRs) are indicated. Primers used to generate the fragments are listed in Supplementary Table 1. J2-9 represent the junctions, i.e. overlapping regions, between the subgenomic fragments. J1 and J10 represent junctions with the TAR vector. Gel images show results from two multiplex PCR designed to confirm the presence of correctly recombined junctions. Multiplex PCR using Set 1 primers (top gel) detects junctions J1, J2, J4, J6 and J8, while multiplex PCR using Set 2 primers (bottom gel) detects junctions J3, J5, J7, J9 and J10. PCR profiles confirm the proper assembly of the YAC containing the MHV-GFP full-length genome in 12 out of 12 clones (clones 1-12). kb, kilobase; bp, base pair; pT7, T7 RNA polymerase promoter; An, poly (A) tail; M, GeneRuler 100-bp plus DNA marker (ThermoScientific). For gel source data, see Supplementary Fig. 2.

**b,** Schematic representation of the MERS-CoV genome organisation and eight viral subgenomic fragments (F1-8) used for TAR cloning. Viral open reading frames (ORFs) and sequence elements at the 5'- and 3'-untranslated regions (UTRs) are indicated. Primers used to generate the fragments are listed in Supplementary Table 1. J2-8 represent the junctions, i.e. overlapping regions, between the subgenomic fragments. J1 and J9 represent junctions with the TAR vector. Gel image shows result from a multiplex PCR designed to detect all junctions (J1-9). PCR profiles confirm the proper assembly of the YAC containing the MERS-CoV viral genome in 7 out of 8 clones. Clone 4 is considered incorrect due to the absence of junction J1. kb, kilobase; bp, base pair; pT7, T7 RNA polymerase promoter; An, poly (A) tail; M, GeneRuler 100-bp plus DNA marker (ThermoScientific). For gel source data, see Supplementary Fig. 2.

**c,** Schematic representation of the MERS-CoV-GFP genome organisation and ten viral subgenomic fragments (F1-10 and F13) used for TAR cloning. Viral open reading frames (ORFs), ORF for GFP and sequence elements at the 5'- and 3'-untranslated regions (UTRs) are indicated. Primers used to generate the fragments are listed in Supplementary Table 1. J2-8 and J10-11 represent the junctions,

i.e. overlapping regions, between the subgenomic fragments. J1 and J9 represent junctions with the TAR vector. Gel images show results from two multiplex PCR designed to confirm the presence of correctly recombined junctions. Multiplex PCR using Set 1 primers (top gel) detects junctions J1-J7, while multiplex PCR using Set 2 primers (bottom gel) detects junctions J8-11. PCR profiles confirm the proper assembly of the YAC containing the MERS-CoV-GFP full-length genome in 5 out of 8 clones (clones 1 and 3-6). Three clones are considered incorrect due to the absence of junction J1 (clone 2), and J9 (clones 7 and 8). kb, kilobase; bp, base pair; pT7, T7 RNA polymerase promoter; An, poly (A) tail; M, 1-kb DNA marker (Promega). For gel source data, see Supplementary Fig. 2.

**d**, Schematic representation of the HCoV-229E genome organisation and thirteen viral subgenomic fragments (F1-13) used for TAR cloning. Viral open reading frames (ORFs) and sequence elements at the 5'- and 3'-untranslated regions (UTRs) are indicated. Primers used to generate the fragments are listed in Supplementary Table 1. J2-13 represent the junctions, i.e. overlapping regions, between the subgenomic fragments. J1 and J14 represent junctions with the TAR vector. Gel images show results from two multiplex PCR designed to confirm the presence of correctly recombined junctions. Multiplex PCR using Set 1 primers (top gel) detects junctions J1, J3, J5, J7, J9, J11 and J13, while multiplex PCR using Set 2 primers (bottom gel) detects junctions J2, J4, J6, J8, J10, J12 and J14. PCR profiles confirm the proper assembly of the YAC containing the HCoV-229E full-length genome in 11 out of 11 clones. kb, kilobases; bp, base pair; pT7, T7 RNA polymerase promoter; An, poly (A) tail; M, GeneRuler 100-bp plus DNA marker (ThermoScientific). For gel source data, see Supplementary Fig. 2.

**e**, Schematic representation of the HCoV-HKU1 genome organisation and eleven viral subgenomic fragments (F1-11) used for TAR cloning. Viral open reading frames (ORFs) and sequence elements at the 5'- and 3'-untranslated regions (UTRs) are indicated. Primers used to generate the fragments are listed in Supplementary Table 1. J2-11 represent the junctions, i.e. overlapping regions, between the subgenomic fragments. J1 and J12 represent junctions with the TAR vector. Gel images show results from two multiplex PCR designed to confirm the presence of correctly recombined junctions. Multiplex PCR using Set 1 primers (top gel) detects junctions J1-J6, while multiplex PCR using Set 2 primers (bottom gel) detects junctions J7- J12. PCR profiles confirm the proper assembly of the YAC containing the HCoV-HKU1 full-length genome in 14 out of 14 clones. kb, kilobases; bp, base pair; pT7, T7 RNA polymerase promoter; An, poly (A) tail; M, 1-kb DNA marker (Promega). For gel source data, see Supplementary Fig. 2.

**f**, Schematic representation of the MERS-CoV-Riyadh-1734-2015 genome organisation and eight viral subgenomic fragments (F1-8) used for TAR cloning. Viral open reading frames (ORFs) and sequence elements at the 5'- and 3'-untranslated regions (UTRs) are indicated. Primers used to generate the fragments are listed in Supplementary Table 1. J2-8 represent the junctions, i.e. overlapping regions, between the subgenomic fragments. J1 and J9 represent junctions with the TAR vector. Gel images show results from two multiplex PCR designed to confirm the presence of correctly recombined junctions. Multiplex PCR using Set 1 primers (top gel) detects junctions J1, J3, J5 and J7, while multiplex PCR using Set 2 primers (bottom gel) detects junctions J2, J4, J6, J8 and J9. PCR profiles confirm the proper assembly of the YAC containing the MERS-CoV-Riyadh-1734-2015 full-length genome in 7 out of 10 clones. Three clones (clones 5, 7 and 8) are considered incorrect due to the absence of all junctions. kb, kilobases; bp, base pair; pT7, T7 RNA polymerase promoter; An, poly (A) tail; M, GeneRuler 100-bp plus DNA marker (ThermoScientific). For gel source data, see Supplementary Fig. 2.

**g**, Schematic representation of the ZIKA virus genome organisation and six viral subgenomic fragments (F1-6) used for TAR cloning. Viral open reading frames (ORFs) and sequence elements at the 5'- and 3'-untranslated regions (UTRs) are indicated. Primers used to generate the fragments are listed in Supplementary Table 1. J2-5 represent the junctions, i.e. overlapping regions, between the subgenomic fragments. J1 and J6 represent junctions with the TAR vector. Gel image shows results from a multiplex PCR designed to detect all junctions (J1-6). PCR profiles confirm the proper assembly of the YAC containing the ZIKA virus full-length genome in 10 out of 10 clones. kb, kilobases; bp, base pair; pT7, T7 RNA polymerase promoter; HDR, hepatitis delta virus ribozyme; M, GeneRuler 100-bp plus DNA marker (ThermoScientific). For gel source data, see Supplementary Fig. 2.

**h**, Schematic representation of the human RSV-B virus genome organisation and six viral subgenomic fragments (F1-6) used for TAR cloning. Viral open reading frames (ORFs) and sequence elements at the 5'- and 3'-untranslated regions (UTRs) are indicated. Primers used to generate the fragments are listed in Supplementary Table 1. J1-5 represent the junctions, i.e. overlapping regions, between the subgenomic fragments. J1 and J5 contain junctions with the TAR vector. Gel image shows results from a multiplex PCR designed to detect all junctions (J1-5). PCR

profiles confirm the proper assembly of the YAC containing the RSV-B full-length genome in 7 out of 8 clones. Clone 6 is considered incorrect due to the absence of junction J2. kb, kilobases; bp, base pair; pT7, T7 RNA polymerase promoter; HHrb, hammerhead ribozyme, Rb-T7ter, Ribozyme and T7 RNA polymerase terminator sequence; M, 1-kb DNA marker (Promega). For gel source data, see Supplementary Fig. 2.

**i**, Schematic representation of the SARS-CoV-2 genome organisation and twelve viral subgenomic fragments (F1-12) used for TAR cloning. Viral open reading frames (ORFs) and sequence elements at the 5'- and 3'-untranslated regions (UTRs) are indicated. Primers used to generate the fragments are listed in Supplementary Table 1. J2-12 represent the junctions, i.e. overlapping regions, between the subgenomic fragments. J1 and J13 represent junctions with the TAR vector. Gel images show results from two multiplex PCR designed to confirm the presence of correctly recombined junctions. Multiplex PCR using Set 1 primers (top gel) detects junctions J1, J3, J5, J7, J9, J11 and J13, while multiplex PCR using Set 2 primers (bottom gel) detects junctions J2, J4, J6, J8, J10 and J12. PCR profiles confirm the proper assembly of the YAC containing the SARS-CoV-2 full-length genome in 6 out of 6 clones. kb, kilobases; bp, base pair; pT7, T7 RNA polymerase promoter; An, poly (A) tail; M, 1-kb DNA marker (Promega). For gel source data, see Supplementary Fig. 2.

**j**, Schematic representation of the SARS-CoV-2-GFP genome organisation and fourteen viral subgenomic fragments (F1-10 and F12-15) used for TAR cloning. Viral open reading frames (ORFs), ORF for GFP and sequence elements at the 5'- and 3'-untranslated regions (UTRs) are indicated. Primers used to generate the fragments are listed in Supplementary Table 1. J2-12 and J14 represent the junctions, i.e. overlapping regions, between the subgenomic fragments. J1 and J13 represent junctions with the TAR vector. Gel images show results from two multiplex PCR designed to confirm the presence of correctly recombined junctions. Multiplex PCR using Set 1 primers (top gel) detects junctions J1, J3, J5, J7, J9, J11 and J13, while multiplex PCR using Set 2 primers (middle gel) detects junctions J2, J4, J6, J8, J10 and J12. PCR profiles confirm the proper assembly of the YAC containing the SARS-CoV-2 full-length genome in 6 out of 6 clones. The presence of the *gfp* gene inserted in fragment 13 was confirmed in all 6 clones using a simplex PCR (bottom gel). kb, kilobases; bp, base pair; pT7, T7 RNA polymerase promoter; An, poly (A) tail; M, 1-kb DNA marker (Promega). For gel source data, see Supplementary Fig. 2.

## **II. Supplementary Figure 2. Raw data of all the uncropped agarose gels used in this study.**

All the gels used in this study presented as uncropped images. Red rectangles indicate gel parts that were cropped for display in Supplementary Fig. 1.

## **III. Supplementary Data 1. Nucleotide sequences of synthetic DNA fragments used to reconstruct recombinant SARS-CoV-2 and SARS-CoV-2-GFP.**

This document includes the nucleotide sequences of the different synthetic fragments used to reconstruct recombinant SARS-CoV-2 and SARS-CoV-2-GFP clones. The presence of restriction sites sequences and other genetic elements are also indicated when needed.

## **IV. Supplementary Table 1. List of primers used in this study.**

Sheet 1. pVC604-MHV-GFP

Sheet 2. pVC604-MERS-CoV

Sheet 3. pCC1BAC-His3-MERS-CoV-GFP

Sheet 4. pVC604-HCoV-229E

Sheet 5. pVC604-HCoV-HKU1

Sheet 6. pCC1BAC-His3-MERS-CoV-Riyadh-1734-2015

Sheet 7. pVC604-ZIKV

Sheet 8. pCC1BAC-His3-hRSVB

Sheet 9. pCC1BAC-His3-SARS-CoV-2

Sheet 10. pCC1BAC-His3-SARS-CoV-2-GFP

Sheet 11. pCC1BAC-His3-synSARS-CoV-2-GFP
