# Supplementary material for: Rapid reconstruction of SARS-CoV-2 using a synthetic genomics platform
Source: Springer Nature journal article supplement (doi:10.1038/s41586-020-2294-9), 2020-05-04
Supplement: 41586_2020_2294_MOESM2_ESM.pdf [file 41586_2020_2294_MOESM2_ESM.pdf]

## Reporting Summary

Nature Research wishes to improve the reproducibility of the work that we publish. This form provides structure for consistency and transparency in reporting. For further information on Nature Research policies, see [Authors & Referees](#) and the [Editorial Policy Checklist](#).

### Statistics

For all statistical analyses, confirm that the following items are present in the figure legend, table legend, main text, or Methods section.

n/a Confirmed

- |                                     |                                     |                                                                                                                                                                                                                                                            |
|-------------------------------------|-------------------------------------|------------------------------------------------------------------------------------------------------------------------------------------------------------------------------------------------------------------------------------------------------------|
| <input type="checkbox"/>            | <input checked="" type="checkbox"/> | The exact sample size ( $n$ ) for each experimental group/condition, given as a discrete number and unit of measurement                                                                                                                                    |
| <input type="checkbox"/>            | <input checked="" type="checkbox"/> | A statement on whether measurements were taken from distinct samples or whether the same sample was measured repeatedly                                                                                                                                    |
| <input type="checkbox"/>            | <input checked="" type="checkbox"/> | The statistical test(s) used AND whether they are one- or two-sided<br><i>Only common tests should be described solely by name; describe more complex techniques in the Methods section.</i>                                                               |
| <input checked="" type="checkbox"/> | <input type="checkbox"/>            | A description of all covariates tested                                                                                                                                                                                                                     |
| <input type="checkbox"/>            | <input checked="" type="checkbox"/> | A description of any assumptions or corrections, such as tests of normality and adjustment for multiple comparisons                                                                                                                                        |
| <input checked="" type="checkbox"/> | <input type="checkbox"/>            | A full description of the statistical parameters including central tendency (e.g. means) or other basic estimates (e.g. regression coefficient) AND variation (e.g. standard deviation) or associated estimates of uncertainty (e.g. confidence intervals) |
| <input checked="" type="checkbox"/> | <input type="checkbox"/>            | For null hypothesis testing, the test statistic (e.g. $F$ , $t$ , $r$ ) with confidence intervals, effect sizes, degrees of freedom and $P$ value noted<br><i>Give <math>P</math> values as exact values whenever suitable.</i>                            |
| <input checked="" type="checkbox"/> | <input type="checkbox"/>            | For Bayesian analysis, information on the choice of priors and Markov chain Monte Carlo settings                                                                                                                                                           |
| <input checked="" type="checkbox"/> | <input type="checkbox"/>            | For hierarchical and complex designs, identification of the appropriate level for tests and full reporting of outcomes                                                                                                                                     |
| <input checked="" type="checkbox"/> | <input type="checkbox"/>            | Estimates of effect sizes (e.g. Cohen's $d$ , Pearson's $r$ ), indicating how they were calculated                                                                                                                                                         |

*Our web collection on [statistics for biologists](#) contains articles on many of the points above.*

### Software and code

Policy information about [availability of computer code](#)

Data collection

Data acquisition for Minion sequencing was done with MinKNOW version 19.06.9 and basecalling software Guppy version 3.4.5.

Data analysis

sequence analysis: Geneious Prime © 2019.2.3  
 virus kinetics analyses: GraphPad Prism version 8.3.0 for Windows  
 figures: Adobe Illustrator and Biorender  
 IFA: Fiji with FigureJ plugin  
 NGS (RNAseq): TrimGalore software (version 0.6.5), STAR (version 2.7.0a); SAMtools (version 1.10);  
 Minion sequencing: Python command-line qcat (Mozilla Public License 2.0. Copyright © 2018 Oxford Nanopore Technologies Ltd. qcat (v1.1.0); Minimap2 (Li, H. Minimap2: pairwise alignment for nucleotide sequences. Bioinformatics 34, 3094-3100, doi:10.1093/bioinformatics/bty191 (2018).)

For manuscripts utilizing custom algorithms or software that are central to the research but not yet described in published literature, software must be made available to editors/reviewers. We strongly encourage code deposition in a community repository (e.g. GitHub). See the Nature Research [guidelines for submitting code & software](#) for further information.

### Data

Policy information about [availability of data](#)

All manuscripts must include a [data availability statement](#). This statement should provide the following information, where applicable:

- Accession codes, unique identifiers, or web links for publicly available datasets
- A list of figures that have associated raw data
- A description of any restrictions on data availability

All Data and files will be made available. The following genome sequences have been submitted to GenBank: rSARS-CoV-2 (#MT108784), hRSV/B/Bern/2019 (#MT107528); MERS-CoV-Riyadh-1734-2015 (#MN481979). The RNAseq data of rSARS-CoV-2(-GFP) has been submitted to the NCBI Sequence Read Archive

## Field-specific reporting

Please select the one below that is the best fit for your research. If you are not sure, read the appropriate sections before making your selection.

Life sciences  Behavioural & social sciences  Ecological, evolutionary & environmental sciences

For a reference copy of the document with all sections, see [nature.com/documents/nr-reporting-summary-flat.pdf](https://www.nature.com/documents/nr-reporting-summary-flat.pdf)

## Life sciences study design

All studies must disclose on these points even when the disclosure is negative.

|                 |                                                                                                                                                                                                                 |
|-----------------|-----------------------------------------------------------------------------------------------------------------------------------------------------------------------------------------------------------------|
| Sample size     | No sample size calculations were performed. Sample sizes were based on standards in the field, typically 3 independent biological replicates, with each replicate assayed in technical duplicate or triplicate. |
| Data exclusions | no data was excluded                                                                                                                                                                                            |
| Replication     | all attempts at replication were successful; experiments were performed according to best practices and as described in the methods.                                                                            |
| Randomization   | randomization was not applied since cloning procedures, virus infection/titrations, and inhibitor/neutralization experiments did not require randomization.                                                     |
| Blinding        | blinding was done for remdsivir inhibition assay and virus neutralisation assay to ensure that images taken from infected cultures are representative.                                                          |

## Reporting for specific materials, systems and methods

We require information from authors about some types of materials, experimental systems and methods used in many studies. Here, indicate whether each material, system or method listed is relevant to your study. If you are not sure if a list item applies to your research, read the appropriate section before selecting a response.

### Materials & experimental systems

| n/a                                 | Involved in the study                                     |
|-------------------------------------|-----------------------------------------------------------|
| <input type="checkbox"/>            | <input checked="" type="checkbox"/> Antibodies            |
| <input type="checkbox"/>            | <input checked="" type="checkbox"/> Eukaryotic cell lines |
| <input checked="" type="checkbox"/> | <input type="checkbox"/> Palaeontology                    |
| <input checked="" type="checkbox"/> | <input type="checkbox"/> Animals and other organisms      |
| <input checked="" type="checkbox"/> | <input type="checkbox"/> Human research participants      |
| <input checked="" type="checkbox"/> | <input type="checkbox"/> Clinical data                    |

### Methods

| n/a                                 | Involved in the study                           |
|-------------------------------------|-------------------------------------------------|
| <input checked="" type="checkbox"/> | <input type="checkbox"/> ChIP-seq               |
| <input checked="" type="checkbox"/> | <input type="checkbox"/> Flow cytometry         |
| <input checked="" type="checkbox"/> | <input type="checkbox"/> MRI-based neuroimaging |

## Antibodies

|                 |                                                                                                                                                                                                                                     |
|-----------------|-------------------------------------------------------------------------------------------------------------------------------------------------------------------------------------------------------------------------------------|
| Antibodies used | anti-SARS-CoV Nucleocapsid (N) protein (rabbit), Rockland, Product No: 200-401-50, Lot No 16570, dilution 1:1000; anti-dsRNA, J2, English and Scientific Consulting, Product No:10010500, clone J2, Lot No J2-1913, dilution 1:200. |
| Validation      | anti-SARS-CoV Nucleocapsid (N) protein (rabbit) and anti-dsRNA, J2 were validated by comparing infected vs uninfected cells and by assessing various dilutions.                                                                     |

## Eukaryotic cell lines

Policy information about [cell lines](#)

|                     |                                                                                                                                                                                                                                                                                                                                                                               |
|---------------------|-------------------------------------------------------------------------------------------------------------------------------------------------------------------------------------------------------------------------------------------------------------------------------------------------------------------------------------------------------------------------------|
| Cell line source(s) | L929 cells (Source : 85011425 (Sigma, ECACC, 2017); authenticated 04/2019);<br>17Cl-1 cells (gift from Stanley Sawicki; authenticated 04/2019);<br>Huh7 cells (gift from Volker Lohman, University of Heidelberg; authentication was done in Heidelberg)<br>Vero, VeroB4 and VeroE6 (obtained from Marcel Müller, Charité, Berlin (co-author); authentication done in Berlin) |
| Authentication      | Profiling of cell line was done using highly-polymorphic short tandem repeat loci (STRs). Fragment analysis was done on an ABI3730xl (Life Technologies) and the resulting data were analyzed with GeneMarker software (Softgenetics).                                                                                                                                        |

Mycoplasma contamination

all cell lines in our laboratory are routinely screened for micoplasma contamination and were tested negative.

Commonly misidentified lines  
(See [ICLAC](#) register)

none
