# Supplementary material for: Rapid reconstruction of SARS-CoV-2 using a synthetic genomics platform
Source: Springer Nature journal article supplement (doi:10.1038/s41586-020-2294-9), 2020-05-04
Supplement: 41586_2020_2294_MOESM5_ESM.pdf [file 41586_2020_2294_MOESM5_ESM.pdf]

## SARS-CoV-2 synthetic fragments

Fragment 1.1

CCCGggcgaaaggggatgtgctgcaagcgattaagttgggtaacgccagggtttcccagtcacgac  
catgcgtccatagtccecg*TAATACGACTCACTATAGAT***ATTAGGTTTATACCTTCCCAGGTAAC**  
**AAACCAACCAACTTTCGATCTCTTGATAGATCTGTTCTCTAAACGAACTTTAAAATCTG**  
**TGTGGCTGTCACTCGGCTGCATGCTTAGTGCCTCACGCAGTATAATTAATAACTAA**  
**TTACTGTCGTTGACAGGACACGAGTAACTCGTCTATCTTCTGCAGGCTGCTTACGGT**  
**TTCGTCCGTGTTGCAGCCGATCATCAGCACATCTAGGTTTTCGTCCGGGTGTGACCGA**  
**AAGGTAAGATGGAGAGCCTTGTCCCTGGTTTCAACGAGAAAACACACGTCCA****ACTC**  
**AGTTTGCCTGTTTTACAGGTTTCGCGACGTGCTCGTACGTGGCTTTGGAGACTCCGTG**  
**GAGGAGGTCTTATCAGAGGCACGTCAACATCTTAAAGATGGCACTTGTGGCTTAGTA**  
**GAAGTTGAAAAAGGCGTTTTGCCTCAACTTGAACAGCCCTATGTGTTTATCAA****CCC**  
GGG

Underline: *Sma*I

Lower case, bold: pCC1 and vaccinia virus sequences

Italic: T7 promoter

Bold: SARS-CoV-2, position 1 – 483. The viral 5'-UTR contains three modified nucleotides indicated in red.

Fragment 1.2

CCCGggcgaaaggggatgtgctgcaaggcgattaagttgggtaacgccagggtttccagtcacgac  
catgctccatagtccegttccg*TAATACGACTCACTATAGT*ATTAGGTTTTTACCTACCCAGGAAAAG  
CCAACCAACCTCGATCTCTTGTAGATCTGTTCTCTAAACGAACTTTAAAATCTGTGTA  
GCTGTCGCTCGGCTGCATGCCTAGTGCACCTACGCAGTATAATTAATAACTAATTAC  
TGTCGTTGACAGGACACGAGTAACTCGTCTATCTTCTGCAGGCTGCTTACGGTTTCG  
TCCGTGTTGCAGCCGATCATCAGCACATCTAGGTTTCGTCCGGGTGTGACCGAAAG  
GTAAGATGGAGAGCCTTGTCCTGGTTTCAACGAGAAAACACACGTCCAACCTCAGTT  
TGCCTGTTTTACAGGTTGCGGACGTGCTCGTACGTGGCTTTGGAGACTCCGTGGAG  
GAGGTCTTATCAGAGGCACGTCAACATCTTAAAGATGGCACTTGTGGCTTAGTAGAA  
GTTGAAAAGGCGTTTTGCCTCAACTTGAACAGCCCTATGTGTTTCAAAACCCGGG

Underline: *Sma*I

Lower case, bold: pCC1 and vaccinia virus sequences

Italic: T7 promoter

Bold, underline: SARS-CoV, position 1 – 124

Bold: SARS-CoV-2, position 125 – 483

Fragment 1.3

CCCGggcgaaaggggatgtgctgcaaggcgattaagttgggtaacgccagggtttccagtcacgac  
catgcgtccatagtccegttcg

*TAATACGACTCACTATAGATTAAAGGTTTATACCTTCCCAGGTAACAAACCAACCAACTT*  
**TCGATCTCTTGTAGATCTGTTCTCTAAACGAACTTTAAAATCTGTGTGGCTGTCACTC**  
**GGCTGCATGCTTAGTGCCTCACGCAGTATAATTAATAACTAATTACTGTCGTTGAC**  
**AGGACACGAGTAACTCGTCTATCTTCTGCAGGCTGCTTACGGTTTCGTCCGTGTTGC**  
**AGCCGATCATCAGCACATCTAGGTTTCGTCCGGGTGTGACCGAAAGGTAAGATGGA**  
**GAGCCTTGTCCCTGGTTTCAACGAGAAAACACACGTCCAACCTCAGTTTGCCTGTTTT**  
**ACAGGTTTCGCGACGTGCTCGTACGTGGCTTTGGAGACTCCGTGGAGGAGGTCTTAT**  
**CAGAGGCACGTCAACATCTTAAAGATGGCACTTGTGGCTTAGTAGAAGTTGAAAAA**  
**GGCGTTTTGCCTCAACTTGAACAGCCCTATGTGTTTCAACCCCGGG**

Underline: *SmaI*

Lower case, bold: pCC1 and vaccinia virus sequences

Italic: T7 promoter

Bold: SARS-CoV-2, position 1 – 483.

Fragment 2

CCCGGGGTTCTTATCAGAGGCACGTCAACATCTTAAAGATGGCACTTGTGGCTTAGTA  
GAAGTTGAAAAAGGCGTTTTGCCTCAACTTGAACAGCCCTATGTGTTTCATCAAACGT  
TCGGATGCTCGAACTGCACCTCATGGTCATGTTATGGTTGAGCTGGTAGCAGAACTC  
GAAGGCATTCAGTACGGTCGTAGTGGTGAGACACTTGGTGTCTTGTCCCTCATGTG  
GGCGAAATACCAGTGGCTTACCGCAAGGTTCTTCTTCGTAAGAACGGTAATAAAGG  
AGCTGGTGGCCATAGTTACGGCGCCGATCTAAAGTCATTTGACTTAGGCGACGAGC  
TTGGCACTGATCCTTATGAAGATTTTCAAGAAAACCTGGAACACTAAACATAGCAGTG  
GTGTTACCCGTGAACTCATGCGTGAGCTTAACGGAGGGGCATACACTCGCTATGTC  
GATAACAACCTTCTGTGGCCCTGATGGCTACCCTCTTGAGTGCATTAAGACCTTCTA  
GCACGTGCTGGTAAAGCTTCATGCACTTTGTCCGAACAACCTGGACTTTATTGACACT  
AAGAGGGGTGTATACTGCTGCCGTGAACATGAGCATGAAATTGCTTGGTACACGGA  
ACGTTCTGAAAAGAGCTATGAATTGCAGACACCTTTTGAAATTAATTGGCAAAGAA  
ATTTGACACCTTCAATGGGGAATGTCCAAATTTTGTATTTCCCTTAAATTCCATAATC  
AAGACTATTC AACCAAGGGTTGAAAAGAAAAGCTTGATGGCTTTATGGGTAGAATT  
CGATCTGTCTATCCAGTTGCGTCACCAAATGAATGCAACCAAATGTGCCTTTCAACT  
CTCATGAAGTGTGATCATTGTGGTGAAACTTCATGGCAGACGGGCGATTTTGTAA  
GCCACTTGCGAATTTTGTGGCACTGAGAATTTGACTAAAGAAGGTGCCACTACTTGT  
GGTTACTTACCCAAAATGCTGTTGTTAAAATTTATTGTCCAGCATGTCACAATTCA  
GAAGTAGGACCTGAGCATAGTCTTGCCGAATACCATAATGAATCTGGCTTGAAAACC  
ATTCTTCGTAAGGGTGGTCGCACTATTGCCTTTGGAGGCTGTGTGTTCTCTTATGTT  
GGTTGCCATAACAAGTGTGCCTATTGGGTTCCACGTGCTAGCGCTAACATAGGTTGT  
AACCATACAGGTGTTGTTGGAGAAGGTTCCGAAGGTCTTAATGACAACCTTCTTGAA  
ATACTCCAAAAAGAGAAAAGTCAACATCAATATTGTTGGTGACTTTAACTTAATGAA  
GAGATCGCCATTATTTTGGCATCTTTTCTGCTTCCACAAGTGCTTTTGTGGAAACT  
GTGAAAGGTTTGGATTATAAAGCATTCAAACAAATTGTTGAATCCTGTGGTAATTTT  
AAAGTTACAAAAGGAAAAGCTAAAAAAGGTGCCTGGAATATTGGTGAACAGAAATC  
AATACTGAGTCCTCTTTATGCATTTGCATCAGAGGCTGCTCGTGTTGTACGATCAAT  
TTTCTCCCGCACTCTTGAAACTGCTCAAATTTCTGTGCGTGTTTTACAGAAGGCCGC  
TATAACAATACTAGATGGAATTCACAGTATTCACTGAGACTCATTGATGCTATGAT  
GTTACATCTGATTTGGCTACTAACAATCTAGTTGTAATGGCCTACATTACAGGTGG  
TGTTGTTTCAAGTTGACTTCGCAGTGGCTAACTAACATCTTTGGCACTGTTTATGAAA  
ACTCAAACCCGTCCTTGATTGGCTTGAAGAGAAGTTTAAGGAAGGTGTAGAGTTTCT  
TAGAGACGGTTGGGAAATTGTTAAATTTATCTCAACCTGTGCTTGTGAAATTGTCCG  
TGGACAAATTGTCACCTGTGCAAAGGAAATTAAGGAGAGTGTTTCAGACATTCTTTAA  
GCTTGTAATAAATTTTTGGCTTTGTGTGCTGACTCTATCATTATTGGTGGAGCTAA  
ACTTAAAGCCTTGAATTTAGGTGAAACATTTGTCACGCACTCAAAGGGATTGTACAG  
AAAGTGTGTTAAATCCAGAGAAGAACTGGCCTACTCATGCCTCTAAAAGCCCCAAA  
AGAAATTATCTTCTTAGAGGGAGAAACACTTCCCACAGAAGTGTTAACAGAGGAAGT  
TGTCTTGAAAACCTGGTGATTTACAACCATTAGAACAACCTACTAGTGAAGCTGTTGA  
AGCTCCATTGGTTGGTACACCAGTTTGTATTAACGGGCTTATGTTGCTCGAAATCAA  
AGACACAGAAAAGTACTGTGCCCTTGCACCTAATATGATGGTAACAAACAATACCTT  
CACACTCAAAGGCGGTGCACCAACAAAGGTTACTTTTGGTGATGACACTGTGATAGA  
AGTGAAGGTTACAAGAGTGTGAATATCACTTTTGAACCTGATGAAAGGATTGATAA  
AGTACTTAATGAGAAGTGCTCTGCCTATACAGTTGAACTCGGTACAGAAGTAAATGA  
GTTCCGCTGTGTTGTGGCAGATGCTGTCATAAAAACCTTTGCAACCAGTATCTGAATT  
ACTTACACCACTGGGCATTGATTTAGATGAGTGGAGTATGGCTACATACTACTTATT  
TGATGAGTCTGGTGAGTTTAAATTGGCTTCACATATGTATTGTTCTTTCTACCCTCCA

**GATGAGGATGAAGAAGAAGGTGATTGTGAAGAAGAAGAGTTTGAGCCATCAACTCA  
ATATGAGTATGGTACTGAAGATGATTACCAAGGTAAACCTTTGGAATTTGGTGCCAC  
TTCTGCTGCTCTTCAACCTGAAGAAGAGCAAGAAGAAGATTGGTTAGATGATGATAG  
TCAACAACTGTTGGTCAACAAGACGGCAGTGAGGACAATCAGACAACACTACTATTCA  
ACAATTGTTGAGGTTCAACCTCAATTAGAGATGGAACCTACACCAGTTGTTCCCGG  
G**

Underline: *SmaI*

Bold: SARS-CoV-2, position 377 – 3325

Fragment 3

GATATCTGGCTTCACATATGTATTGTTCTTTCTACCCTCCAGATGAGGATGAAGAAG  
AAGGTGATTGTGAAGAAGAAGAGTTTGGAGCCATCAACTCAATATGAGTATGGTACTG  
AAGATGATTACCAAGGTAACCTTTGGAATTTGGTGCCACTTCTGCTGCTCTTCAAC  
CTGAAGAAGAGCAAGAAGAAGATTGGTTAGATGATGATAGTCAACAACTGTTGGT  
CAACAAGACGGCAGTGAGGACAATCAGACAACACTACTATTCAAACAATTGTTGAGGTT  
CAACCTCAATTAGAGATGGAACCTTACACCAGTTGTTTCAGACTATTGAAGTGAATAGT  
TTTAGTGGTTATTTAAACTTACTGACAATGTATACATTAAAAATGCAGACATTGTG  
GAAGAAGCTAAAAAGGTAACCAACAGTGGTTGTTAATGCAGCCAATGTTTACCTT  
AAACATGGAGGAGGTGTTGCAGGAGCCTTAAATAAGGCTACTAACAAATGCCATGCA  
AGTTGAATCTGATGATTACATAGCTACTAATGGACCACTTAAAGTGGGTGGTAGTTG  
TGTTTTAAGCGGACACAATCTTGCTAAACACTGTCTTCATGTTGTGCGCCCAAATGT  
TAACAAAGGTGAAGACATTCAACTTCTTAAGAGTGCTTATGAAAATTTAATCAGCA  
CGAAGTTCTACTTGCACCATTATTATCAGCTGGTATTTTTGGTGCTGACCCTATACAT  
TCTTTAAGAGTTTGTGTAGATACTGTTTCGCACAAATGTCTACTTAGCTGTCTTTGATA  
AAAATCTCTATGACAACTTGTTC AAGCTTTTTGGAAATGAAGAGTGAAGAGCAAG  
TTGAACAAAAGATCGCTGAGATTCCTAAAGAGGAAGTTAAGCCATTTATAACTGAAA  
GTAAACCTTCAGTTGAACAGAGAAAACAAGATGATAAGAAAATCAAAGCTTGTGTTG  
AAGAAGTTACAACAACCTCTGGAAGAACTAAGTTCCTCACAGAAAACCTTGTTACTTT  
ATATTGACATTAATGGCAATCTTCATCCAGATTCTGCCACTCTTGTTAGTGACATTGA  
CATCACTTTCTTAAAGAAAGATGCTCCATATATAGTGGGTGATGTTGTTCAAGAGGG  
TGTTTTAACTGCTGTGGTTATACCTACTAAAAAGGCTGGTGGCACTACTGAAATGCT  
AGCGAAAGCTTTGAGAAAAGTGCCAACAGACAATTATATAACCACTTACCCGGGTCA  
GGGTTTAAATGGTTACACTGTAGAGGAGGCAAAGACAGTGCTTAAAAAGTGTA  
GTGCCTTTTACATTCTACCATCTATTATCTCTAATGAGAAGCAAGAAATCTTGGAAC  
TGTTTCTTGGAATTTGCGAGAAATGCTTGCACATGCAGAAGAAACACGCAAATTAAT  
GCCTGTCTGTGTGGAACCTAAAGCCATAGTTTCAACTATACAGCGTAAATATAAGGG  
TATTAATAACAAGAGGGTGTGGTTGATTATGGTGCTAGATTTTACTTTTACACCAG  
TAAACAACCTGTAGCGTCACTTATCAACACACTTAACGATCTAAATGAAACTCTTGT  
TACAATGCCACTTGGCTATGTAACACATGGCTTAAATTTGGAAGAAGCTGCTCGGTA  
TATGAGATCTCTCAAAGTGCCAGCTACAGTTTCTGTTTCTTCACCTGATGCTGTTAC  
AGCGTATAATGGTTATCTTACTTCTTCTTCTAAAACACCTGAAGAACATTTTATTGAA  
ACCATCTCACTTGTGGTTCTATAAAGATTGGTCTATTCTGGACAATCTACACAA  
CTAGGTATAGAATTTCTTAAAGAGAGGTGATAAAAGTGTATATTACACTAGTAATCCT  
ACCACATTCCACCTAGATGGTGAAGTTATCACCTTTGACAATCTTAAAGACACTTCTTT  
CTTTGAGAGAAGTGAGGACTATTAAGGTGTTTACAACAGTAGACAACATTAACCTCC  
ACACGCAAGTTGTGGACATGTCAATGACATATGGACAACAGTTTGGTCCAACCTTATT  
TGGATGGAGCTGATGTTACTAAAATAAAACCTCATAATTCACATGAAGGTAAAACAT  
TTTATGTTTTACCTAATGATGACACTCTACGTGTTGAGGCTTTTGAGTACTACCACAC  
AACTGATCCTAGTTTTCTGGGTAGGTACATGTCAGCATTAAATCACACTAAAAAGTG  
GAAATACCACAAGTTAATGGTTTAACTTCTATTAATGGGCAGATAACAACTGTTA  
TCTTGCCACTGCATTGTTAACACTCCAACAAATAGAGTTGAAGTTAATCCACCTGC  
TCTACAAGATGCTTATTACAGAGCAAGGGCTGGTGAAGCTGCTAACTTTTGTGCACT  
TATCTTAGCCTACTGTAATAAGACAGTAGGTGAGTTAGGTGATGTTAGAGAAACAAT  
GAGTTACTTGTTC AACATGCCAATTTAGATTCTTGCAAAAGAGTCTTGAACGTGGT  
GTGTAACCTTGTGGACAACAGCAGACAACCTTAAAGGGTGTAGAAGCTGTTATGTA  
CATGGGCACACTTTCTTATGAACAATTTAAGAAAGGTGTTTCAGATACCTTGTACGTG  
TGGTAAACAAGCTACAAAATATCTAGTACAACAGGAGTCACCTTTTGTTATGATGTC

**AGCACCACTGCTCAGTATGAACTTAAGCATGGTACATTTACTTGTGCTAGTGAGTA  
CACTGGTAATTACCAGTGTGGTCACTATAAACATATAACTTCTAAAGAACTTTGTA  
TTGCATAGACGGTGCTTTACTTACAAAGTCCTCAGAATACAAAGGTCCTATTACGGA  
TGTTTTCTACAAAGAAAACAGTTACACAACAACCATAAAACCAGTTACTTATAAATT  
GGATGGTGTTGTTTGTACAGAAATTGACCCTAAGTTGGACAATTATTATAAGAAAGA  
CAATTCTTATTTACAGAGCAACCAATTGATCTTGTACCAAACCAACCATATCCAAA  
CGCAAGCTTCGATAATTTTAAGTTTGTATGTGATAATATCAAATTTGCTGATGATTTA  
AACCAGTTAACTGGTTATAAGAAACCTGCTTCAAGAGAGCTTAAAGTTACATTTTTC  
CCTGACTTAAATGGTGATGTGGTGGCTATTGATTATAAACACTACACACCCTCTTTT  
AAGAAAGGAGCTAAATTGTTACATAAACCTATTGTTTGGCATGTTAACAATGCAACT  
AATAAAGCCACGTATAAACCAATACCTGGTGTATACGTTGTCTTTGGAGCACAAAG  
ATATC**

Underline: *EcoRV*

Bold: SARS-CoV-2, position 3012 – 6315

Fragment 4

GATATCTTGTACCAAACCAACCATATCCAAACGCAAGCTTCGATAAATTTAAGTTTGT  
ATGTGATAATATCAAATTTGCTGATGATTTAAACCAGTTAACTGGTTATAAGAAACC  
TGCTTCAAGAGAGCTTAAAGTTACATTTTTCCCTGACTTAAATGGTGATGTGGTGGC  
TATTGATTATAAACTACACACCCTCTTTTAAGAAAGGAGCTAAATTGTTACATAAA  
CCTATTGTTTGGCATGTTAACAATGCAACTAATAAAGCCACGTATAAACCAAATACC  
TGGTGTATACGTTGTCTTTGGAGCACAAAACCAGTTGAAACATCAAATTCGTTTGAT  
GTAAGTGAAGTCAGAGGACGCGCAGGGAATGGATAATCTTGCCTGCGAAGATCTAAA  
ACCAGTCTCTGAAGAAGTAGTGGAAAATCCTACCATACAGAAAGACGTTCTTGAGTG  
TAATGTGAAAACCTACCGAAGTTGTAGGAGACATTATACTTAAACCAGCAAATAATAG  
TTTAAAATTACAGAAGAGGTTGGCCACACAGATCTAATGGCTGCTTATGTAGACAA  
TTCTAGTCTTACTATTAAGAAACCTAATGAATTATCTAGAGTATTAGGTTTGAAAACC  
CTTGCTACTCATGGTTTAGCTGCTGTTAATAGTGTCCCTTGGGATACTATAGCTAAT  
TATGCTAAGCCTTTTCTTAACAAAGTTGTTAGTACAACCTACTAACATAGTTACACGGT  
GTTTAAACCGTGTTTGTACTAATTATATGCCCTTATTTCTTTACTTTATTGCTACAATT  
GTGTACTTTTACTAGAAGTACAAATTCTAGAATTAAGCATCTATGCCGACTACTAT  
AGCAAAGAATACTGTTAAGAGTGTGGTAAATTTTGTCTAGAGGCTTCATTTAATTA  
TTTGAAGTCACCTAATTTTTCTAACTGATAAATATTATAATTTGGTTTTTACTATTA  
AGTGTTCCTAGGTTCTTAACTACTCAACCGCTGCTTTAGGTGTTTTAATGTCTA  
ATTTAGGCATGCCTTCTTACTGTACTGGTTACAGAGAAGGCTATTTGAACTCTACTA  
ATGTCACTATTGCAACCTACTGTACTGGTTCTATACCTTGTAGTGTGTCTTAGTGG  
TTTAGATTCTTTAGACACCTATCCTTCTTTAGAACTATACAAATTACCATTTTCTCT  
TTTTAAATGGGATTTAACTGCTTTTGGCTTAGTTGCAGAGTGGTTTTTGGCATATATTC  
TTTTCACTAGGTTTTTCTATGTACTTGGATTGGCTGCAATCATGCAATTGTTTTTTCAG  
CTATTTTGCAGTACATTTTATTAGTAATTTCTTGGCTTATGTGGTTAATAATTAATCTT  
GTACAAATGGCCCCGATTTTCTAGCTATGGTTAGAATGTACATCTTCTTTGCATCATTTT  
ATTATGTATGGAAAAGTTATGTGCATGTTGTAGACGGTTGTAATTCATCAACTTGTA  
TGATGTGTTACAAACGTAATAGAGCAACAAGAGTCGAATGTACAACCTATTGTTAATG  
GTGTTAGAAGGTCCTTTTATGTCTATGCTAATGGAGGTAAGGCTTTTGGCAAACCTAC  
ACAATTGGAATTGTGTTAATTGTGATAACATTCTGTGCTGGTAGTACATTTATTAGTG  
ATGAAGTTGCGAGAGACTTGTCACTACAGTTTAAAAGACCAATAAATCCTACTGACC  
AGTCTTCTTACATCGTTGATAGTGTACAGTGAAGAATGGTTCCATCCATCTTTACTT  
TGATAAAGCTGGTCAAAGACTTATGAAAGACATTCTCTCTCATTTTGTAACTTA  
GACAACCTGAGAGCTAATAACACTAAAGGTTTATTGCCTATTAATGTTATAGTTTTT  
GATGGTAAATCAAATGTGAAGAATCATCTGCAAATCAGCGTCTGTTTACTACAGT  
CAGCTTATGTGTCAACCTATACTGTTACTAGATCAGGCATTAGTGTCTGATGTTGGT  
GATAGTGCAGGAAAGTTGCAGTTAAAATGTTTGTATGCTTACGTTAATACGTTTTTCTCA  
ACTTTTAAACGTACCAATGGAAAACTCAAACACTAGTTGCAACTGCAGAAGCTGAA  
CTTGGCAAAGAATGTGTCTTAGACAATGTCTTATCTACTTTTATTTCAGCAGCTCGG  
CAAGGGTTTGTGATTGATGATGATGATAAAGTAAAGATGTTGTTGAATGTCTTAAATTG  
TCACATCAATCTGACATAGAAGTTACTGGCGATAGTTGTAATAACTATATGCTCACC  
TATAACAAAGTTGAAAACATGACACCCCGTGACCTTGGTGCTTGTATTGACTGTAGT  
GCGCGTCATATTAATGCGCAGGTAGCAAAAAGTCAACAACATTGCTTTGATATGGAAC  
GTTAAAGATTTTATGTCATTGTCTGAACAACCTACGAAAACAAATACGTAGTGTCTGCT  
AAAAAGAATAACTTACCTTTTAAAGTTGACATGTGCAACTACTAGACAAGTTGTTAAT  
GTTGTAACAACAAGATAGCACTTAAAGGGTGGTAAAATTGTTAATAATTGGTTGAAG  
CAGTTAATTAAGTTACACTTGTGTTCCTTTTTGTGCTGCTATTTTCTATTTAATAA  
CACCTGTTTATGTCATGTCTAAACATACTGACTTTTCAAGTGAAATCATAGGATACA



**AGGCTATTGATGGTGGTGTCACTCGTGACATAGCATCTACAGATACTTGTTTTGCTA  
ACAAACATGCTGATTTTGACACATGGTTTAGCCAGCGTGGTGGTAGTTATACTAATG  
ACAAAGCTTGCCCATGATTGCTGCAGTCATAACAAGAGAAGTGGGTTTTGTCGTGC  
CTGGTTTGCCTGGCACGATATTACGCACAATAATGGTGACTTTTTGCATTTCTTAC  
CTAGAGTTTTTAGTGCAGTTGGTAACATCTGTTACACACCATCAAACTTATAGAGT  
ACACTGACTTTGCAACCATATG**

Underline: *EcoRV*

Underline, italic: *NdeI*

Bold: SARS-CoV-2, position 6003 – 8994

Fragment 5

CCCGGGTGACATAGCATCTACAGATACTTGT~~TTTT~~GCTAACAAACATGCTGATTTTGAC  
ACATGGTTTAGCCAGCGTGGTGGTAGTTATACTAATGACAAAGCTTGCCCATTGATT  
GCTGCAGTCATAACAAGAGAAGTGGGTTTTGTCGTGCCTGGTTTGCCTGGCACGAT  
ATTACGCACAAC~~TAAT~~GGT~~GACTTTTT~~GCATTTCTTACCTAGAGTTTTTAGTGCAGTT  
GGTAACATCTGTTACACACCATCAA~~AACTT~~ATAGAGTACACTGACTTTGCAACATCA  
GCTTGTGTTTTGGCTGCTGAATGTACAATTTTTAAAGATGCTTCTGGTAAGCCAGTA  
CCATATTGTTATGATACCAATGTACTAGAAGGTTCTGTTGCTTATGAAAGTTTACGC  
CCTGACACACGTTATGTGCTCATGGATGGCTCTATTATTCAATTTCTAACACCTAC  
CTTGAAGGTTCTGTTAGAGTGGTAACAAC~~TTTT~~GATTCTGAGTACTGTAGGCACGGC  
ACTTGTGAAAGATCAGAAGCTGGTGT~~TTT~~GTGTATCTACTAGTGGTAGATGGGTACTT  
AACAATGATTATTACAGATCTTTACCAGGAGTTTTCTGTGGTGTAGATGCTGTAAAT  
TTACTTACTAATATGTTTACACCACTAATTCAACCTATTGGTGCTTTGGACATATCAG  
CATCTATAGTAGCTGGTGGTATTGTAGCTATCGTAGTAACATGCCTTGCCTACTATT  
TTATGAGGTTTAGAAGAGCTTTTGGTGAATACAGTCATGTAGTTGCCTTTAATACTT  
TACTATTCCTTATGTCATTCACTGTACTCTGTTTAAACACCAGTTTACTCATTCTTACC  
TGGTGT~~TTT~~ATTCTGTTATTTACTTGTACTTGACATTTTATCTTACTAATGATGTTTCTT  
TTTTAGCACATATTCAGTGGATGGTTATGTTACACCTTTAGTACCTTTCTGGATAAC  
AATTGCTTATATCATTGTATTTCCACAAAGCATTCTATTGGTTCTTTAGTAATTAC  
CTAAAGAGACGTGTAGTCTTTAATGGTGT~~TT~~CCTTTAGTACTTTTTGAAGAAGCTGCG  
CTGTGCACCTTTTTGTAAATAAAGAAATGTATCTAAAGTTGCGTAGTGATGTGCTA  
TTACCTCTTACGCAATATAATAGATACTTAGCTCTTTATAATAAGTACAAGTATTTTA  
GTGGAGCAATGGATACA~~ACT~~AGCTACAGAGAAGCTGCTTGTGTCATCTCGCAAAG  
GCTCTCAATGACTTCAGTAACTCAGGTTCTGATGTTCTTTACCAACCACCACAAACC  
TCTATCACCTCAGCTGTTTTGCAGAGTGGTTTTAGAAAAATGGCATTCCCATCTGGT  
AAAGTTGAGGGTTGTATGGTACAAGTAACTTGTGGTACA~~ACT~~TAAACGGTCTT  
TGGCTTGATGACGTAGTTTACTGTCCAAGACATGTGATCTGCACCTCTGAAGACATG  
CTTAAACCCTAATTATGAAGATTTACTCATTTCGTAAGTCTAATCATAATTTCTTGGTAC  
AGGCTGGTAATGTTCAACTCAGGGTTATTGGACATTCTATGCAAAATTTGTGTACTTA  
AGCTTAAAGGTTGATACAGCCAATCCTAAGACACCTAAGTATAAGTTTGTTCGCATTC  
AACCAGGACAGACTTTTTCAGTGTTAGCTTGTTACAATGGTTCACCATCTGGTGT~~TT~~  
ACCAATGTGCTATGAGGCCCAATTTCACTATTAAGGGTTCATTTCCTTAATGGTTCAT  
GTGGTAGTGTGGTTTTAACATAGATTATGACTGTGTCTTTTTTGTACATGCACCA  
TATGGAATTACCAACTGGAGTTCATGCTGGCACAGACTTAGAAGGTA~~ACTTTTT~~ATGG  
ACCTTTTGTGACAGGCAAACAGCACAAGCAGCTGGTACGGACACA~~ACT~~ATTACAGT  
TAATGTTTTAGCTTGGTTGTACGCTGCTGTTATAAATGGAGACAGGTGGTTTTCTCAA  
TCGATTTACCACA~~ACT~~CTTAATGACTTTAACCTTGTGGCTATGAAGTACAATTATGAA  
CCTCTAACACAAGACCATGTTGACATACTAGGACCTCTTTCTGCTCAA~~ACT~~GGAATT  
GCCGTTTTAGATATGTGTGCTTCATTA~~AA~~GAATTACTGCAAAATGGTATGAATGGA  
CGTACCATATTGGGTAGTGCTTTATTAGAAGATGAATTTACACCTTTTGATGTTGTTA  
GACAATGCTCAGGTGTTACTTTCCAAAGTGCAGTGAAAAGAACAATCAAGGGTACAC  
ACCACTGGTTGTTACTCACAATTTTGACTTCACTTTTAGTTTTAGTCCAGAGTACTCA  
ATGGTCTTTGTCTTTTTTTTTGTATGAAAATGCCTTTTTACCTTTTGCTATGGGTATT  
ATTGCTATGTCTGCTTTTGTCAATGATGTTTGTCAAACATAAGCATGCATTTCTCTGTT  
TGTTTTTGTACCTTCTCTTGCCACTGTAGCTTATTTAATATGGTCTATATGCCTGC  
TAGTTGGGTGATGCGTATTATGACATGGTTGGATATGGTTGATACTAGTTTGTCTGG  
TTTTAAGCTAAAAGACTGTGTTATGTATGCATCAGCTGTAGTGTTACTAATCCTTATG  
ACAGCAAGAACTGTGTATGATGATGGTGTAGGAGAGTGTGGACACTTATGAATGT

**CTTGACACTCGTTTATAAAGTTTATTATGGTAATGCTTTAGATCAAGCCATTTCCATG  
TGGGCTCTTATAATCTCTGTTACTTCTAACTACTCAGGTGTAGTTACAACCTGTCATGT  
TTTTGGCCAGAGGTATTGTTTTTATGTGTGTTGAGTATTGCCCTATTTTCTTCATAAC  
TGGTAATACACTTCAGTGTATAATGCTAGTTTATTGTTTCTTAGGCTATTTTGTACT  
TGTTACTTTGGCCTCTTTTGTTTACTCAACCGCTACTTTAGACTGACTCTTGGTGTTT  
ATGATTACTTAGTTTCTACACAGGAGTTTAGATATATGAATTCACAGGGACTACTCC  
CACCCAAGAATAGCATAGATGCCTTCAAACCTAACATTAAATTGTTGGGTGTTGGTG  
GCAAACCTTGTATCAAAGTAGCCACTGTACAGTCTAAAATGTCAGATGTAAAGTGCA  
CATCAGTAGTCTTACTCTCAGTTTTGCAACAACCTCAGAGTAGAATCATCATCTAAATT  
GTGGGCTCAATGTGTCCAGTTACACAATGACATTCTCTTAGCCCGGG**

Underline: *Sma*I

Bold: SARS-CoV-2, position 8718 – 11966

Fragment 5A

CCCGGGTGACATAGCATCTACAGATACTTGTTTTTGCTAACAACATGCTGATTTTGAC  
ACATGGTTTAGCCAGCGTGGTGGTAGTTATACTAATGACAAAGCTTGCCCATTGATT  
GCTGCAGTCATAACAAGAGAAGTGGGTTTTGTCGTGCCTGGTTTGCCTGGCACGAT  
ATTACGCACAACATAATGGTGACTTTTTGCATTTCTTACCTAGAGTTTTTAGTGCAGTT  
GGTAACATCTGTTACACACCATCAAACCTTATAGAGTACACTGACTTTGCAACATCA  
GCTTGTGTTTTGGCTGCTGAATGTACAATTTTTAAAGATGCTTCTGGTAAGCCAGTA  
CCATATTGTTATGATACCAATGTACTAGAAGGTTCTGTTGCTTATGAAAGTTTACGC  
CCTGACACACGTTATGTGCTCATGGATGGCTCTATTATTCAATTTCTAACACCTAC  
CTTGAAGGTTCTGTTAGAGTGGTAAACAACTTTTGATTCTGAGTACTGTAGGCACGGC  
ACTTGTGAAAGATCAGAAGCTGGTGTGGTGTATCTACTAGTGGTAGATGGGTACTT  
AACAATGATTATTACAGATCTTTACCAGGAGTTTTCTGTGGTGTAGATGCTGTAAAT  
TTACTTACTAATATGTTTACACCACTAATTCAACCTATTGGTGCTTTGGACATATCAG  
CATCTATAGTAGCTGGTGGTATTGTAGCTATCGTAGTAACATGCCTTGCCTACTATT  
TTATGAGGTTTAGAAGAGCTTTTGGTGAATACAGTCATGTAGTTGCCTTTAATACTT  
TACTATTCCTTATGTCATTCACTGTACTCTGTTTAAACACCAGTTTACTCATTCTTACC  
TGGTGTTTATTCTGTTATTTACTTGTACTTGACATTTTATCTTACTAATGATGTTTCTT  
TTTTAGCACATATTCAGTGGATGGTATTGTTTACACCTTTAGTACCTTTCTGGATAAC  
AATTGCTTATATCATTGTATTTCCACAAAGCATTCTATTGGTTCCTTAGTAATTAC  
CTAAAGAGACGTGTAGTCTTTAATGGTGTTCCTTTAGTACTTTTGAAGAAGCTGCG  
CTGTGCACCTTTTTGTAAATAAAGAAATGTATCTAAAGTTGCGTAGTGATGTGCTA  
TTACCTCTTACGCAATATAATAGATACTTAGCTCTTTATAATAAGTACAAGTATTTTA  
GTGGAGCAATGGATACAACACTAGCTACAGAGAAGCTGCTTGTGTCATCTCGCAAAG  
GCTCTCAATGACTTCAGTAACTCAGGTTCTGATGTTCTTTACCAACCACCACAAACC  
TCTATCACCTCAGCTGTTTTGCAGAGTGGTTTTAGAAAAATGGCATTCCCATCTGGT  
AAAGTTGAGGGTTGTATGGTACAAGTAACTTGTGGTACAACACTTAAACGGTCTT  
TGGCTTGATGACGTAGTTTACTGTCCAAGACATGTGATCTGCACCTCTGAAGACATG  
CTTAACCCTAATTATGAAGATTTACTCATTTCGTAAGTCTAATCATAATTTCTTGGTAC  
AGGCTGGTAATGTTCAACTCAGGGTATTGGACATTCTATGCAAAATTGTGTACTTA  
AGCTTAAGGTTGATACAGCCAATCCTAAGACACCTAAGTATAAGTTTGTTCGCATTC  
AACCAGGACAGACTTTTTCAGTGTTAGCTTGTTACAATGGTTCACCATCTGGTGT  
ACCAATGTGCTATGAGGCCCAATTTCACTATTAAGGGTTCATTCC

Underline: *Sma*I

Bold: SARS-CoV-2, position 8718 – 10475

Fragment 5B

GGCCCAATTTCACTATTAAGGGTTCATTCTTAATGGTTCATGTGGTAGTGTGGTT  
TTAACATAGATTATGACTGTGTCTTTTTGTTACATGCACCATATGGAATTACCAAC  
TGGAGTTCATGCTGGCACAGACTTAGAAGGTAACCTTTTATGGACCTTTTGTGACAG  
GCAAACAGCACAAGCAGCTGGTACGGACACAACCTATTACAGTTAATGTTTTAGCTTG  
GTTGTACGCTGCTGTTATAAATGGAGACAGGTGGTTTTCTCAATCGATTTACCACAAC  
TCTTAATGACTTTAACCTTGTGGCTATGAAGTACAATTATGAACCTCTAACACAAGA  
CCATGTTGACATACTAGGACCTCTTCTGCTCAAACCTGGAATTGCCGTTTTAGATAT  
GTGTGCTTCATTAAGAATTACTGCAAAATGGTATGAATGGACGTACCATATTGGG  
TAGTGCTTTATTAGAAGATGAATTTACACCTTTTGATGTTGTTAGACAATGCTCAGG

**TGTTACTTTCCAAAGTGCAGTGAAAAGAACAATCAAGGGTACACACCACTGGTTGTT  
ACTCACA**

Bold: SARS-CoV-2, position 10446 – 11023

Fragment 5C

**AAGGGTACACACCACTGGTTGTTACTCACAATTTTGACTTCACTTTTAGTTTTAGTCC  
AGAGTACTCAATGGTCTTTGTTCTTTTTTTGTATGAAAATGCCTTTTACCTTTTGC  
TATGGGTATTATTGCTATGTCTGCTTTTGCAATGATGTTTGTCAAACATAAGCATGC  
ATTTCTCTGTTTGTGTTTACCTTCTCTTGCCACTGTAGCTTATTTAATATGGTC  
TATATGCCTGCTAGTTGGGTGATGCGTATTATGACATGGTTGGATATGGTTGATACT  
AGTTTGTCTGGTTTTAAGCTAAAAGACTGTGTTATGTATGCATCAGCTGTAGTGTTA  
CTAATCCTTATGACAGCAAGAAGTGTGTATGATGATGGTGCTAGGAGAGTGTGGAC  
ACTTATGAATGTCTTGACACTCGTTTATAAAGTTTATTATGGTAATGCTTTAGATCAA  
GCCATTTCCATGTGGGCTCTTATAATCTCTGTTACTTCTAACTACTCAGGTGTAGTTA  
CAACTGTCATGTTTTTGGCCAGAGGTATTG**

Bold: SARS-CoV-2, position 10994 – 11540

Fragment 5D

**CAACTGTCATGTTTTTGGCCAGAGGTATTGTTTTTATGTGTGTTGAGTATTGCCCTAT  
TTTCTTCATAACTGGTAATACACTTCAGTGTATAATGCTAGTTTATTGTTTCTTAGGC  
TATTTTTGTAAGTTGTTACTTTGGCCTCTTTTGTGTTACTCAACCGCTACTTTAGACTGA  
CTCTTGGTGTGTTATGATTACTTAGTTTCTACACAGGAGTTTAGATATATGAATTCACA  
GGGACTACTCCCACCCAAGAATAGCATAGATGCCTTCAAACCTCAACATTAATTTGTT  
GGGTGTTGGTGGCAAACCTTGTATCAAAGTAGCCACTGTACAGTCTAAAATGTCAGA  
TGTAAGTGCACATCAGTAGTCTTACTCTCAGTTTTGCAACAACCTCAGAGTAGAATC  
ATCATCTAAATTGTGGGCTCAATGTGTCCAGTTACACAATGACATTCTCTTAGCCCGG  
G**

Underline: *SmaI*

Bold: SARS-CoV-2, position 11511 – 11966

Fragment 6

CCCGGGTCAACCGCTACTTTAGACTGACTCTTGGTGTTTTATGATTACTTAGTTTCTAC  
ACAGGAGTTTAGATATATGAATTCACAGGGACTACTCCCACCCAAGAATAGCATAGA  
TGCCTTCAAACCTCAACATTA AATTGTTGGGTGTTGGTGGCAAACCTTGTATCAAAGT  
AGCCACTGTACAGTCTAAAATGTCAGATGTAAAGTGCACATCAGTAGTCTTACTCTC  
AGTTTTGCAACAACCTCAGAGTAGAATCATCATCTAAATTGTGGGCTCAATGTGTCCA  
GTTACACAATGACATTCTCTTAGCTAAAGATACTACTGAAGCCTTTGAAAAAATGGT  
TTCACTACTTTCTGTTTTGCTTTCCATGCAGGGTGCTGTAGACATAAACAAGCTTTGT  
GAAGAAATGCTGGACAACAGGGCAACCTTACAAGCTATAGCCTCAGAGTTTAGTTCC  
CTTCCATCATATGCAGCTTTTGGCTACTGCTCAAGAAGCTTATGAGCAGGCTGTTGCT  
AATGGTGATTCTGAAGTTGTTCTTAAAAAGTTGAAGAAGTCTTTGAATGTGGCTAAA  
TCTGAATTTGACCGTGATGCAGCCATGCAACGTAAGTTGGAAAAGATGGCTGATCAA  
GCTATGACCCAAATGTATAAACAGGCTAGATCTGAGGACAAGAGGGCAAAAAGTTAC  
TAGTGCTATGCAGACAATGCTTTTCACTATGCTTAGAAAAGTTGGATAATGATGCACT  
CAACAACATTATCAACAATGCAAGAGATGGTTGTGTTCCCTTGAACATAATACCTCT  
TACAACAGCAGCCAACTAATGGTTGTCATACCAGACTATAACACATATAAAAATAC  
GTGTGATGGTACAACATTTACTTATGCATCAGCATTGTGGGAAATCCAACAGGTTGT  
AGATGCAGATAGTAAAATTGTTCAACTTAGTGAAATTAGTATGGACAATTCACCTAA  
TTTAGCATGGCCTCTTATTGTAACAGCTTTAAGGGCCAATTCTGCTGTCAAATTACA  
GAATAATGAGCTTAGTCCTGTTGCACTACGACAGATGTCTTGTGCTGCCGGTACTAC  
ACAACTGCTTGCCTGATGACAATGCGTTAGCTTACTACAACACAACAAAGGGAGG  
TAGGTTTGTACTTGCCTGTTATCCGATTTACAGGATTTGAAATGGGCTAGATTCCC  
TAAGAGTGATGGAACCTGGTACTATCTATACAGAACTGGAACCACCTTGTAGGTTTGT  
TACAGACACACCTAAAGGTCCTAAAGTGAAGTATTTATACTTTATTAAGGATTA  
CAACCTAAATAGAGGTATGGTACTTGGTAGTTTAGCTGCCACAGTACGTCTACAAGC  
TGTAATGCAACAGAAGTGCCTGCCAATTCAACTGTATTATCTTTCTGTGCTTTTGC  
TGTAGATGCTGCTAAAGCTTACAAAGATTATCTAGCTAGTGGGGGACAACCAATCAC  
TAATTGTGTTAAGATGTTGTGTACACACACTGGTACTGGTCAGGCAATAACAGTTAC  
ACCGGAAGCCAATATGGATCAAGAATCCTTTGGTGGTGCATCGTGTGTGCTGACTG  
CCGTTGCCACATAGATCATCCAAATCCTAAAGGATTTTGTGACTTAAAAGGTAAGTA  
TGTACAAATACCTACAACCTTGTGCTAATGACCCTGTGGGTTTTACACTTAAAAACAC  
AGTCTGTACCGTCTGCGGTATGTGGAAAGGTTATGGCTGTAGTTGTGATCAACTCCG  
CGAACCCATGCTTCAGTCAGCTGATGCACAATCGTTTTTAAACGGGTTTGCGGTGTA  
AGTGCAGCCCGTCTTACACCGTGCGGCACAGGCACTAGTACTGATGTGCTATACAG  
GGCTTTTGACATCTACAATGATAAAGTAGCTGGTTTTGCTAAATTCTAAAACTAA  
TTGTTGTGCTTCCAAGAAAAGGACGAAGATGACAATTTAATTGATTCTTACTTTGT  
AGTTAAGAGACACACTTTCTCTAACTACCAACATGAAGAAACAATTTATAATTTACTT  
AAGGATTGTCCAGCTGTTGCTAAACATGACTTCTTTAAGTTTAGAATAGACGGTGAC  
ATGGTACCACATATATCACGTCAACGTCTTACTAAATACACAATGGCAGACCTCGTC  
TATGCTTTAAGGCATTTTGTGATGAAGGTAATTGTGACACATTAAGAAGAAACTTGTG  
ACATACAATTGTTGTGATGATGATTATTTCAATAAAAAGGACTGGTATGATTTTGTG  
GAAAACCCAGATATATTACGCGTATACGCCAACTTAGGTGAACGTGTACGCCAAGCT  
TTGTTAAAAACAGTACAATTCTGTGATGCCATGCGAAATGCTGGTATTGTTGGTGTA  
CTGACATTAGATAATCAAGATCTCAATGGTAACTGGTATGATTTCCGGTGATTTCCATA  
CAAACCACGCCAGGTAGTGGAGTTCCTGTTGTAGATTCTTATTATTATTGTTAATG  
CCTATATTAACCTTGACCAGGGCTTTAACTGCAGAGTCACATGTTGACACTGACTTA  
ACAAAGCCTTACATTAAGTGGGATTTGTTAAAATATGACTTCACGGAAGAGAGGTTA  
AAACTCTTTGACCGTATTTTTAAATATTGGGATCAGACATACCACCCAATTTGTGTTA

**ACTGTTTGGATGACAGATGCATTCTGCATTGTGCAAACCTTAAATGTTTTATTCTCTAC  
AGTGTTCACCTACAAGTTTTGGACCACTAGTGAGAAAAATATTTGTTGATGGTGT  
TCCATTTGTAGTTTCAACTGGATACCACTTCAGAGAGCTAGGTGTTGTACATAATCA  
GGATGTAAACTTACATAGCTCTAGACTTAGTTTTAAGGAATTACTTGTGTATGCTGC  
TGACCCTGCTATGCACGCTGCTTCTGGTAATCTATTACCCGGG**

Underline: *Sma*I

Bold: SARS-CoV-2, position 11664 – 14605

Fragment 7

CCCGGGATCAGACATAACCACCCAAATTGTGTTAACTGTTTGGATGACAGATGCATTC  
TGCATTGTGCAAACCTTAATGTTTTATTCTCTACAGTGTTCCCACCTACAAGTTTTGG  
ACCACTAGTGAGAAAAATATTTGTTGATGGTGTTCATTTGTAGTTTCAACTGGATA  
CCACTTCAGAGAGCTAGGTGTTGTACATAATCAGGATGTAAACTTACATAGCTCTAG  
ACTTAGTTTTAAGGAATTACTTGTGTATGCTGCTGACCCTGCTATGCACGCTGCTTC  
TGGTAATCTATTACTAGATAAACGCCTACGTGCTTTTCAGTAGCTGCACTTACTAA  
CAATGTTGCTTTTCAAACCTGTCAAACCCGGTAATTTTAAACAAAGACTTCTATGACTTT  
GCTGTGTCTAAGGGTTTCTTTAAGGAAGGAAGTTCTGTTGAATTA AAAACACTTCTTC  
TTTGCTCAGGATGGTAATGCTGCTATCAGCGATTATGACTACTATCGTTATAATCTA  
CCAACAATGTGTGATATCAGACA ACTACTATTTGTAGTTGAAGTTGTTGATAAGTAC  
TTTGATTGTTACGATGGTGGCTGTATTAATGCTAACCAAGTCATCGTCAACAACCTA  
GACAAATCAGCTGGTTTTCCATTTAATAAATGGGGTAAGGCTAGACTTTATTATGAT  
TCAATGAGTTATGAGGATCAAGATGCACTTTTCGCATATACAAAACGTAATGTCATC  
CCTACTATAACTCAAATGAATCTTAAGTATGCCATTAGTGCAAAGAATAGAGCTCGC  
ACCGTAGCTGGTGTCTCTATCTGTAGTACTATGACCAATAGACAGTTTCATCAAAAA  
TTATTGAAATCAATAGCCGCCACTAGAGGAGCTACTGTAGTAATTGGAACAAGCAAA  
TTCTATGGTGGTTGGCACAACATGTTAAAACTGTTTATAGTGATGTAGAAAACCT  
CACCTTATGGGTTGGGATTATCCTAAATGTGATAGAGCCATGCCTAACATGCTTAGA  
ATTATGGCCTCACTTGTCTTGCTCGCAAACATACAACGTGTTGTAGCTTGTACACAC  
CGTTTCTATAGATTAGCTAATGAGTGTGCTCAAGTATTGAGTGAAATGGTCATGTGT  
GGCGGTTCACTATATGTTAAACCAGGTGGAACCTCATCAGGAGATGCCACAACCTGCT  
TATGCTAATAGTGTTTTTAACATTTGTCAAGCTGTCACGGCCAATGTTAATGCACTTT  
TATCTACTGATGGTAACAAAATTGCCGATAAGTATGTCCGCAATTTACAACACAGAC  
TTTATGAGTGTCTCTATAGAAATAGAGATGTTGACACAGACTTTGTGAATGAGTTTT  
ACGCATATTTGCGTAAACATTTCTCAATGATGATACTCTCTGACGATGCTGTTGTGT  
GTTTCAATAGCACTTATGCATCTCAAGGTCTAGTGGCTAGCATAAAGA ACTTTAAGT  
CAGTTCTTTATTATCAAAACAATGTTTTTATGTCTGAAGCAAAATGTTGGACTGAGA  
CTGACCTTACTAAAGGACCTCATGAATTTTGCTCTCAACATACAATGCTAGTTAAAC  
AGGGTGATGATTATGTGTACCTTCCTTACCCAGATCCATCAAGAATCCTAGGGGGCCG  
GCTGTTTTGTAGATGATATCGTAAAAACAGATGGTACACTTATGATTGAACGGTTCG  
TGTCTTTAGCTATAGATGCTTACCCACTTACTAAACATCCTAATCAGGAGTATGCTG  
ATGTCTTTCATTTGTA CTTACAATACATAAGAAAGCTACATGATGAGTTAACAGGAC  
ACATGTTAGACATGTATTTCTGTTATGCTTACTAATGATAACACTTCAAGGTATTGGG  
AACCTGAGTTTTATGAGGCTATGTACACACCCGCATACAGTCTTACAGGCTGTTGGGG  
CTTGTGTTCTTTGCAATTCACAGACTTCATTAAGATGTGGTGCTTGCATACGTAGAC  
CATTCTTATGTTGTAAATGCTGTTACGACCATGTCATATCAACATCACATAAATTAGT  
CTTGTCTGTTAATCCGTATGTTTGCATGCTCCAGGTTGTGATGTCACAGATGTGAC  
TCAACTTTACTTAGGAGGTATGAGCTATTATTGTAATCACATAAACCACCATTAG  
TTTTCCATTGTGTGCTAATGGACAAGTTTTTGGTTTATATAAAAATACATGTGTTGGT  
AGCGATAATGTTACTGACTTTAATGCAATTGCAACATGTGACTGGACAAATGCTGGT  
GATTACATTTTAGCTAACACCTGTA CTGAAAGACTCAAGCTTTTTGCAGCAGAAACG  
CTCAAAGCTACTGAGGAGACATTTAAACTGTCTTATGGTATTGCTACTGTACGTGAA  
GTGCTGTCTGACAGAGAATTACATCTTTCATGGGAAGTTGGTAAACCTAGACCACCA  
CTTAACCGAAATTATGTCTTTACTGGTTATCGTGTA ACTAAAAACAGTAAAGTACAA  
ATAGGAGAGTACACCTTTGAAAAAGGTGACTATGGTGTGCTGTTGTTTACCGAGGT  
ACAACA ACTTACAAATTAATGTTGGTGATTATTTTGTGCTGACATCACATACAGTA  
ATGCCATTAAGTGCACCTACACTAGTGCCACAAGAGCACTATGTTAGAATTACTGGC



TTATACCCAACACTCAATATCTCAGATGAGTTTTCTAGCAATGTTGCAAATTATCAAA  
AGGTTGGTATGCAAAAGTATTCTACACTCCAGGGACCACCTGGTACTGGTAAGAGTC  
ATTTTGCTATTGGCCTAGCTCTCTACTACCCTTCTGCTCGCATAGTGTATAACAGCTTG  
CTCTCATGCCGCTGTTGATGCACTATGTGAGAAGGCATTAATAATTTGCCTATAGA  
TAAATGTAGTAGAATTATACCTGCACGTGCTCGTGTAGAGTGTTTTGATAAATTCAA  
AGTGAATTCAACATTAGAACAGTATGTCTTTTGTACTGTAAATGCATTGCCTGAGAC  
GACAGCAGATATAGTTGTCTTTGATGAAATTTCAATGGCCACAAATTATGATTTGAG  
TGTTGTCAATGCCAGATTACGTGCTAAGCACTATGTGTACATTGGCGACCCTGCTCA  
ATTACCTGCACCACGCACATTGCTAACTAAGGGCACACTAGAACCAGAATATTTCAA  
TTCAGTGTGTAGACTTATGAAAACACTATAGGTCCAGACATGTTCCCTCGGAACTTGTCC  
GCGTTGTCCTGCTGAAATTGTTGACACTGTGAGTGCTTTGGTTTATGATAATAAGCT  
TAAAGCACATAAAGACAAATCAGCTCAATGCTTTAAAATGTTTTATAAGGGTGTAT  
CACGCATGATGTTTCATCTGCAACCCGGG

Underline: *Sma*I

Bold: SARS-CoV-2, position 14311 – 17698

Fragment 7Aa

CCCGGGATCAGACATAACCACCCAAATTGTGTAACTGTTTGGATGACAGATGCATTC  
TGCATTGTGCAAACCTTTAATGTTTTATTCTCTACAGTGTTCCCACCTACAAGTTTTGG  
ACCACTAGTGAGAAAAATATTTGTTGATGGTGTTCATTTGTAGTTTCAACTGGATA  
CCACTTCAGAGAGCTAGGTGTTGTACATAATCAGGATGTAAACTTACATAGCTCTAG  
ACTTAGTTTTAAGGAATTACTTGTGTATGCTGCTGACCCTGCTATGCACGCTGCTTC  
TGGTAATCTATTACTAGATAAACGCCTACGTGCTTTTCAGTAGCTGCACTTACTAA  
CAATGTTGCTTTTCAAACCTGTCAAACCCGGTAATTTTAAACAAAGACTTCTATGACTTT  
GCTGTGTCTAAGGGTTTCTTTAAGGAAGGAAGTTCTGTTGAATTA AAAACACTTCTTC  
TTTGCTCAGGATGGTAATGCTGCTATCAGCGATTATGACTACTATCGTTATAATCTA  
CCAACAATGTGTGATATCAGACA ACTACTATTTGTAGTTGAAGTTGTTGATAAGTAC  
TTTGATTGTTACGATGGTGGCTGTATTAATGCTAACCAAGTCATCGTCAACAACCTA  
GACAAATCAGCTGGTTTTCCATTTAATAAATGGGGTAAGGCTAGACTTTATTATGAT  
TCAATGAGTTATGAGGATCAAGATGCACTTTTCGCATATACAAAACGTAATGTCATC  
CCTACTATAACTCAAATGAATCTTAAGTATGCCATTAGTGCAAAGAATAGAGCTCGC  
ACCGTAGCTGGTGTCTCTATCTGTAGTACTATGACCAATAGACAGTTTCATCAAAAA  
TTATTGAAATCAATAGCCGCCACTAGAGGAGCTACTGTAGTAATTGGAACAAGCAAA  
TTCTATGGTGGTTGGCACAACATGTTAAAACTGTTTATAGTGATGTAGAAAACCCT  
CACCTTATGGGTTGGGATTATCCTAAATGTGATAGAGCCATGCCTAACATGCTTAGA  
ATTATGGCCTCACTTGTTCCTTGCTCGCAAACATACAACGTGTTGTAGCTTGTACAC  
CGTTTCTATAGATTAGCTAATGAGTGTGCTCAAGTATTGAGTGAAATGGTCATGT

Underline: *SmaI*

Bold: SARS-CoV-2, position 14311 – 15445

Fragment 7Ab

**GTGCTCAAGTATTGAGTGAAATGGTCATGTGTGGCGGTTCACTATATGTTAAACCAG**  
**GTGGAACCTCATCAGGAGATGCCACA ACTGCTTATGCTAATAGTGTTTTTAACATTT**  
**GTCAAGCTGTCACGGCCAATGTTAATGCACTTTTATCTACTGATGGTAACAAAATTG**  
**CCGATAAGTATGTCCGCAATTTACAACACAGACTTTATGAGTGTCTCTATAGAAATA**  
**GAGATGTTGACACAGACTTTGTGAATGAGTTTTACGCATATTTGCGTAAACATTTCT**  
**CAATGATGATACTCTCTGACGATGCTGTTGTGTGTTTCAATAGCACTTATGCATCTC**  
**AAGGTCTAGTGGCTAGCATAAAGAACTTTAAGTCAGTTCTTTATTATCAAAAACAATG**  
**TTTTTATGTCTGAAGCAAAAATGTTGGACTGAGACTGACCTTACTAAAGGACCTCATG**  
**AATTTTGCTCTCAACATACAATGCTAGTTAAACAGGGTGATGATTATGTGTACCTTC**  
**CTTACCCAGATCCATCAAGAATCCTAGGGGCCGGCTGTTTTGTAGATGATATCGTAA**  
**AAACAGATGGTACACTTATGATTGAACGGTTCGTGTCTTTAGCT**

Bold: SARS-CoV-2, position 15416 – 16029

Fragment 7B

**CTTATGATTGAACGGTTCGTGTCTTTAGCTATAGATGCTTACCCACTTACTAAACATC**  
**CTAATCAGGAGTATGCTGATGTCTTTCAATTTGTACTTACAATACATAAGAAAGCTAC**  
**ATGATGAGTTAACAGGACACATGTTAGACATGTATTCTGTTATGCTTACTAATGATA**

ACACTTCAAGGTATTGGGAACCTGAGTTTTATGAGGCTATGTACACACCCGCATACAG  
TCTTACAGGCTGTTGGGGCTTGTGTTCTTTGCAATTCACAGACTTCATTAAGATGTG  
GTGCTTGCATACGTAGACCATTCTTATGTTGTAAATGCTGTTACGACCATGTCATAT  
CAACATCACATAAATTAGTCTTGTCTGTTAATCCGTATGTTTGCAATGCTCCAGGT  
GTGATGTCACAGATGTGACTCAACTTTACTTAGGAGGTATGAGCTATTATTGTAAAT  
CACATAAACCACCCATTAGTTTTCCATTGTGTGCTAATGGACAAGTTTTTTGGTTTATA  
TAAAAATACATGTGTTGGTAGCGATAATGTTACTGACTTTAATGCAATTGCAACATG  
TGACTIONGACAAATGCTGGTGATTACATTTTAGCTAACACCTGTACTIONGAAAGACTCAA  
GCTTTTTGACAGCAGAAACGCTCAAAGCTACTGAGGAGACATTTAAACTGTCTTATGG  
TATTGCTACTGTACGTGAAGTGTCTGTCTGACAGAGAATTACATCTTTCATGGGAAGT  
TGGTAAACCTAGACCACCACTTAACCGAAATTATGTCTTTACTGGTTATCGTGTAAC  
TAAAAACAGTAAAGTACAAATAGGAGAGTACACCTTTGAAAAAGGTGACTATGGTGA  
TGCTGTTGTTTACCGAGGTACAACAACCTTACAAATTAATGTTGGTGATTATTTTGT  
GCTGACATCACATACAGTAATGCCATTAAGTGCACCTACACTAGTGCCACAAGAGCA  
CTATGTTAGAATTACTGGCTTATACCCAACACTCAATATCTCAGATGAGTTTTCTAGC  
AATGTTGCAAATTATCAAAGGTTGGTATGCAAAGTATTCTACACTCCAGGGACCA  
CCTGGTACTGGTAAGAGTCATTTTGTCTATTGGCCTAGCTCTCTACTACCCTTCTGCT  
CGCATAGTGTATACAGCTTGCTCTCATGCCGCTGTTGATGCACTATGTGAGAAGGCA  
TAAAAATATTTGCCTATAGATAAATGTAGTAGAATTATACCTGCACGTGCTCGTGTA  
GAGTGTTTTGATAAATTCAAAGTGAATTCAACATTAGAACAGTATGTCTTTTGTACT  
GTAAATGCATTGCCTGAGACGACAGCAGATATAGTTGTCTTTGATGAAATTTCAATG  
GCCACAAATTATGATTTGAGTGTGTCAATGCCAGATTACGTGCTAAGCACTATGTG  
TACATTGGCGACCCTGCTCAATTACCTGCACCACGCACATTGCTAACTAAGGGCACA  
CTAGAACCAGAATATTTCAATTCAGTGTGTAGACTTATGAAACTATAGGTCCAGAC  
ATGTTCCCTCGGAACTTGTCCGGCTTGTCTGCTGAAATTGTTGCACTGTGAGTGT  
TTGGTTTATGATAATAAGCTTAAAGCACATAAAGACAAATCAGCTCAATGCTTTAAA  
ATGTTTTATAAGGGTGTATCACGCATGATGTTTCATCTGCAACCCGGG

Underline: *Sma*I

Bold: SARS-CoV-2, position 16000 – 17698

Fragment 8

CCCGGGGATGCCAGATTACGTGCTAAGCACTATGTGTACATTGGCGACCCTGCTCAAT  
TACCTGCACCACGCACATTGCTAACTAAGGGCACACTAGAACCAGAATATTTCAATT  
CAGTGTGTAGACTTATGAAAACCTATAGGTCCAGACATGTTCTCGGAACTTGTGGC  
GTTGTCCTGCTGAAATTGTTGACACTGTGAGTGCTTTGGTTTATGATAATAAGCTTA  
AAGCACATAAAGACAAATCAGCTCAATGCTTTAAAATGTTTTATAAGGGTGTATCA  
CGCATGATGTTTCATCTGCAATTAACAGGCCACAAATAGGCGTGGTAAGAGAATTCC  
TTACACGTAACCCTGCTTGGAGAAAAGCTGTCTTTATTTACCTTATAATTCACAGA  
ATGCTGTAGCCTCAAAGATTTTGGGACTACCAACTCAAACCTGTTGATTCATCACAGG  
GCTCAGAATATGACTATGTCATATTCACTCAAACCACTGAAACAGCTCACTCTTGTA  
ATGTAAACAGATTTAATGTTGCTATTACCAGAGCAAAAAGTAGGCATACTTTGCATAA  
TGTCTGATAGAGACCTTTATGACAAGTTGCAATTTACAAGTCTTGAAATTCACGTA  
GGAATGTGGCAACTTTACAAGCTGAAAATGTAACAGGACTCTTTAAAGATTGTAGTA  
AGGTAATCACTGGGTTACATCCTACACAGGCACCTACACACCTCAGTGTTGACACTA  
AATTCAAAACCTGAAGGTTTATGTGTTGACATACCTGGCATACTAAGGACATGACCT  
ATAGAAGACTCATCTCTATGATGGGTTTTAAAATGAATTATCAAGTTAATGGTTACC  
CTAACATGTTTATCACCCGCGAAGAAGCTATAAGACATGTACGTGCATGGATTGGCT  
TCGATGTCGAGGGGTGTCATGCTACTAGAGAAGCTGTTGGTACCAATTTACCTTTAC  
AGCTAGGTTTTTCTACAGGTGTTAACCTAGTTGCTGTACCTACAGGTTATGTTGATA  
CACCTAATAATACAGATTTTTCCAGAGTTAGTGCTAAACCACCGCCTGGAGATCAAT  
TTAAACACCTCATAACCACTTATGTACAAAAGGACTTCCTTGGAATGTAGTGCGTATAA  
AGATTGTACAAATGTTAAGTGACACACTTAAAAATCTCTCTGACAGAGTCGTATTTG  
TCTTATGGGCACATGGCTTTGAGTTGACATCTATGAAGTATTTTGTGAAAATAGGAC  
CTGAGCGCACCTGTTGTCTATGTGATAGACGTGCCACATGCTTTTCCACTGCTTCAG  
ACACTTATGCCTGTTGGCATTCTATTGGATTTGATTACGTCTATAATCCGTTTAT  
GATTGATGTTCAACAATGGGGTTTTACAGGTAACCTACAAAGCAACCATGATCTGTA  
TTGTCAAGTCCATGGTAATGCACATGTAGCTAGTTGTGATGCAATCATGACTAGGTG  
TCTAGCTGTCCACGAGTGCTTTGTTAAGCGTGTTGACTGGACTATTGAATATCCTAT  
AATTGGTGATGAACTGAAGATTAATGCGGCTTGTAGAAAAGGTTCAACACATGGTTGT  
TAAAGCTGCATTATTAGCAGACAAATCCCAGTTCTTCACGACATTGGTAACCCTAA  
AGCTATTAAGTGTGTACCTCAAGCTGATGTAGAATGGAAGTTCTATGATGCACAGCC  
TTGTAGTGACAAAGCTTATAAAAATAGAAGAATTATTCTATTCTTATGCCACACATTCT  
GACAAATTCACAGATGGTGTATGCCTATTTTGGAAATGCAATGTCGATAGATATCCT  
GCTAATTCCATTGTTTGTAGATTTGACACTAGAGTGCTATCTAACCTTAACTTGCCTG  
GTTGTGATGGTGGCAGTTTGTATGTAAATAAACATGCATTCCACACACCAGCTTTTG  
ATAAAAAGTGCTTTTGTTAATTTAAAACAATTACCATTTTTCTATTACTCTGACAGTCC  
ATGTGAGTCTCATGGAAAACAAGTAGTGTGATAGATATAGATTATGTACCACTAAAGTC  
TGCTACGTGTATAACACGTTGCAATTTAGGTGGTGCTGTCTGTAGACATCATGCTAA  
TGAGTACAGATTGTATCTCGATGCTTATAACATGATGATCTCAGCTGGCTTTAGCTT  
GTGGGTTTACAAACAATTTGATACTTATAACCTCTGGAACACTTTTACAAGACTTCA  
GAGTTTAGAAAATGTGGCTTTTAAATGTTGTAATAAGGGACACTTTTGATGGACAACA  
GGGTGAAGTACCAGTTTCTATCATTAAATAACACTGTTTACACAAAAGTTGATGGTGT  
TGATGTAGAATTGTTTGAATAAAAACAACATTACCTGTTAATGTAGCATTGAGCT  
TTGGGCTAAGCGCAACATTAAACCAGTACCAGAGGTGAAAATACTCAATAATTTGGG  
TGTGGACATTGCTGCTAATACTGTGATCTGGGACTACAAAAGAGATGCTCCAGCACA  
TATATCTACTATTGGTGTGTTGTTCTATGACTGACATAGCCAAGAAACCAACTGAAAC  
GATTTGTGCACCACTCACTGTCTTTTTTGTGATGGTAGAGTTGATGGTCAAGTAGACTT  
ATTTAGAAATGCCCGTAATGGTGTCTTATTACAGAAGGTAGTGTTAAAGGTTTACA

**ACCATCTGTAGGTCCCAAACAAGCTAGTCTTAATGGAGTCACATTAATTGGAGAAGC  
CGTAAAAACACAGTTCAATTATTATAAGAAAGTTGATGGTGTGTCCAACAATTACC  
TGAAACTTACTTTACTCAGAGTAGAAATTTACAAGAATTTAAACCCAGGAGTCAAAT  
GGAAATTGATTTCTTAGAATTAGCTATGGATGAATTCATTGAACGGTATAAATTAGA  
AGGCTATGCCTTCGAACATATCGTTTATGGAGATTTTAGTCATAGTCAGTTAGGTCC  
CGGG**

Underline: *Sma*I

Bold: SARS-CoV-2, position 17399 – 20358

Fragment 9

CCCGGGAGTCACATTAATTGGAGAAGCCGTAAAAACACAGTTCAATTATTATAAGAA  
AGTTGATGGTGTGTGCCAACAAATTACCTGAACTTACTTTACTCAGAGTAGAAATTT  
ACAAGAATTTAAACCCAGGAGTCAAATGGAAATTGATTTCTTAGAATTAGCTATGGA  
TGAATTCATTGAACGGTATAAATTAGAAGGCTATGCCTTCGAACATATCGTTTATGG  
AGATTTTAGTCATAGTCAGTTAGGTGGTTTACATCTACTGATTGGACTAGCTAAACG  
TTTTAAGGAATCACCTTTTGAATTAGAAGATTTTATTCCCTATGGACAGTACAGTTAAA  
AACTATTTCATAACAGATGCGCAAACAGGTTTCATCTAAGTGTGTGTGTTCTGTTATT  
GATTTATTACTTGATGATTTTGTGAAATAATAAAATCCCAAGATTTATCTGTAGTTT  
CTAAGGTTGTCAAAGTGACTATTGACTATACAGAAATTTCAATTTATGCTTTGGTGTA  
AAGATGGCCATGTAGAAACATTTTACCCAAAATTACAATCTAGTCAAGCGTGGCAAC  
CGGGTGTGCTATGCCTAATCTTTACAAAATGCAAAGAATGCTATTAGAAAAGTGTG  
ACCTTCAAATTTATGGTGATAGTGCAACATTACCTAAAGGCATAATGATGAATGTCCG  
CAAAATATACTCAACTGTGTCAATATTTAAACACATTAACATTAGCTGTACCCTATAA  
TATGAGAGTTATACATTTTGGTGCTGGTTCTGATAAAGGAGTTGCACCAGGTACAGC  
TGTTTTAAGACAGTGGTTGCCTACGGGTACGCTGCTTGTGCGATTCAGATCTTAATGA  
CTTTGTCTCTGATGCAGATTCAACTTTGATTGGTGATTGTGCAACTGTACATACAGC  
TAATAAATGGGATCTCATTATTAGTGATATGTACGACCCTAAGACTAAAAATGTTAC  
AAAAGAAAATGACTCTAAAGAGGGTTTTTTCACTTACATTTGTGGGTTTATACAACA  
AAAGCTAGCTCTTGGAGGTTCCGTGGCTATAAAGATAACAGAACATTCTTGGGAATGC  
TGATCTTTATAAGCTCATGGGACACTTCGCATGGTGGACAGCCTTTGTTACTAATGT  
GAATGCGTCATCATCTGAAGCATTTTTAATTGGATGTAATTATCTTGGCAAACCACG  
CGAACAAATAGATGGTTATGTCATGCATGCAAATTACATATTTTGGAGGAATACAAA  
TCCAATTCAGTTGTCTTCCCTATTCTTTATTTGACATGAGTAAATTTCCCTTAAATTA  
AGGGGTACTGCTGTTATGTCTTTAAAGAAGGTCAAATCAATGATATGATTTTATCT  
CTTCTTAGTAAAGGTAGACTTATAATTAGAGAAAACAACAGAGTTGTTATTTCTAGT  
GATGTTCTTGTTAAACAATAAACAATGTTTGTGTTTTCTTGTGTTTTATTGCCACTA  
GTCTCTAGTCAGTGTGTTAATCTTACAACCAGAACTCAATTACCCCTGCATACACT  
AATCTTTACACGTTGGTGTGTTATTACCCTGACAAAGTTTTTCAGATCCTCAGTTTTAC  
ATCAACTCAGGACTTGTCTTACCTTTCTTTTCCAATGTTACTTGGTTCCATGCTAT  
ACATGTCTCTGGGACCAATGGTACTAAGAGGTTTGATAACCCTGTCCTACCATTTAA  
TGATGGTGTGTTATTTTGGCTTCCACTGAGAAGTCTAACATAATAAGAGGCTGGATTTT  
TGGTACTACTTTAGATTCGAAGACCCAGTCCCTACTTATTGTTAATAACGCTACTAAT  
GTTGTTATTAAGTCTGTGAATTTCAATTTTGTAAATGATCCATTTTTGGGGTGTGTTATT  
ACCACAAAACAACAAAAGTTGGATGGAAAGTGAGTTCAGAGTTTATTCTAGTGCGA  
ATAATTGCACTTTTGAATATGTCTCTCAGCCTTTTCTTATGGACCTTGAAGGAAAACA  
GGGTAATTTCAAAAATCTTAGGGAATTTGTGTTAAGAATATTGATGGTTATTTTAAA  
ATATATTCTAAGCACACGCCTATTAATTTAGTGCGTGATCTCCCTCAGGGTTTTTCG  
GCTTTAGAACCATTGGTAGATTTGCCAATAGGTATTAACATCACTAGGTTTCAA  
TTACTTGCTTTACATAGAAGTTATTTGACTCCTGGTGATTCTTCTTCAGGTTGGACAG  
CTGGTGCTGCAGCTTATTATGTGGGTTATCTTCAACCTAGGACTTTTCTATTAAAATA  
TAATGAAAATGGAACCATTACAGATGCTGTAGACTGTGCACTTGACCCTCTCTCAGA  
AACAAAGTGTACGTTGAAATCCTTCACTGTAGAAAAAGGAATCTATCAAACCTTCTAA  
CTTTAGAGTCCAACCAACAGAATCTATTGTTAGATTTCCCTAATATTACAACTTGTGC  
CCTTTTGGTGAAGTTTTTAAACGCCACCAGATTTGCATCTGTTTATGCTTGGAACAGG  
AAGAGAATCAGCAACTGTGTTGCTGATTATTCTGTCCCTATATAATTCCGCATCATTTT  
CCACTTTTAAAGTGTATGGAGTGTCTCCTACTAAATTAATGATCTCTGCTTTACTAA  
TGTCTATGCAGATTCATTTGTAATTAGAGGTGATGAAGTCAGACAAATCGCTCCAGG

**GCAA**ACTGGAAAGATTGCTGATTATAATTATAAAATTACCAGATGATTTTACAGGCTG  
CGTTATAGCTTGGAATTCTAACAATCTTGATTCTAAGGTTGGTGGTAATTATAATTAC  
CTGTATAGATTGTTTAGGAAGTCTAATCTCAAACCTTTTGAGAGAGATATTTCAACT  
GAAATCTATCAGGCCGGTAGCACACCTTGTAATGGTGTGAAGGTTTAAATTGTTAC  
TTTCCTTTACAATCATATGGTTTCCAACCCACTAATGGTGTGGTTACCAACCATACA  
GAGTAGTAGTACTTTCTTTTGAACTTCTACATGCACCAGCAACTGTTTGTGGACCTA  
AAAAGTCTACTAATTTGGTTAAAAACAAATGTGTCAATTTCAACTTCAATGGTTTAAAC  
AGGCACAGGTGTTCTTACTGAGTCTAACAAAAAGTTTCTGCCTTTCCAACAATTTGG  
CAGAGACATTGCTGACACTACTGATGCCCGGG

Underline: *Sma*I

Bold: SARS-CoV-2, position 20110 – 23286

Fragment 10

CCCGGGAATCTATCAGGCCGGTAGCACACCTTGTAATGGTGTGGAAGGTTTTAATTG  
TTACTTTTCCTTTACAATCATATGGTTTTCCAACCCACTAATGGTGTGGTTACCAACCA  
TACAGAGTAGTAGTACTTTCTTTTGAACCTTCTACATGCACCAGCAACTGTTTGTGGA  
CCTAAAAAGTCTACTAATTTGGTTAAAAACAAATGTGTCAATTTCAACTTCAATGGTT  
TAACAGGCACAGGTGTTCTTACTGAGTCTAACAAAAAGTTTCTGCCTTTCCAACAAT  
TTGGCAGAGACATTGCTGACACTACTGATGCTGTCCGTGATCCACAGACACTTGAGA  
TTCTTGACATTACACCATGTTCTTTTGGTGGTGCAGTGTATAACACCAGGAACAA  
ATACTTCTAACCAGGTTGCTGTTCTTTATCAGGATGTTAACTGCACAGAAGTCCCTG  
TTGCTATTCATGCAGATCAACTTACTCCTACTTGGCGTGTTTATTCTACAGGTTCTAA  
TGTTTTTCAAACACGTGCAGGCTGTTAATAGGGGCTGAACATGTCAACAACCTCATA  
TGAGTGTGACATACCCATTGGTGCAGGTATATGCGCTAGTTATCAGACTCAGACTAA  
TTCTCCTCGGCGGGCACGTAGTGTAGCTAGTCAATCCATCATTGCCTACACTATGTC  
ACTTGGTGCAGAAAATTCAGTTGCTTACTCTAATAACTCTATTGCCATACCCACAAA  
TTTTACTATTAGTGTACCACAGAAATCTACCAGTGTCTATGACCAAGACATCAGT  
AGATTGTACAATGTACATTTGTGGTGATTCAACTGAATGCAGCAATCTTTTGTGCA  
ATATGGCAGTTTTTGTACACAATTAACCGTGCTTTAACTGGAATAGCTGTTGAACA  
AGACAAAAACACCCAAGAAGTTTTTGCACAAGTCAAACAAATTTACAAAACACCACC  
AATTAAGATTTTTGGTGGTTTTAATTTTTCACAAATATTACCAGATCCATCAAAACCA  
AGCAAGAGGTCATTTATTGAAGATCTACTTTTCAACAAAGTGACACTTGCAGATGCT  
GGCTTCATCAAACAATATGGTGATTGCCTTGGTGATATTGCTGCTAGAGACCTCATT  
TGTGCACAAAAGTTTAACGGCCTTACTGTTTTGCCACCTTTGCTCACAGATGAAATG  
ATTGCTCAATACACTTCTGCACTGTTAGCGGGTACAATCACTTCTGGTTGGACCTTT  
GGTGCAGGTGCTGCATTACAAATACCATTTGCTATGCAAATGGCTTATAGGTTAAT  
GGTATTGGAGTTACACAGAATGTTCTCTATGAGAACCMAAAATTTGATTGCCAACCAA  
TTTAATAGTGCTATTGGCAAAATTCAGACTCACTTTCTTCCACAGCAAGTGCACCT  
GGAAAATTCAGATGTGGTCAACCAAAATGCACAAGCTTTAAACACGCTTGTTAAA  
CAACTTAGCTCCAATTTTTGGTGCAATTTCAAGTGTTTTAAATGATATCCTTTCACGTC  
TTGACAAAGTTGAGGCTGAAGTGCAAATTTGATAGGTTGATCACAGGCAGACTTCAAA  
GTTTGCAGACATATGTGACTCAACAATTAATTAGAGCTGCAGAAATCAGAGCTTCTG  
CTAATCTTGCTGCTACTAAAATGTCAGAGTGTGTACTTGGACAATCAAAAAGAGTTG  
ATTTTTGTGGAAAGGGCTATCATCTTATGTCCTTCCCTCAGTCAGCACCTCATGGTG  
TAGTCTTCTTGCATGTGACTTATGTCCCTGCACAAGAAAAGAACTTCACAACTGCTC  
CTGCCATTTGTCATGATGGAAAAGCACACTTTCCTCGTGAAGGTGTCTTTGTTTCAA  
ATGGCACACACTGGTTTGTAAACACAAAGGAATTTTTATGAACCACAAATCATTACTA  
CAGACAACACATTTGTGTCTGGTAACTGTGATGTTGTAATAGGAATTGTCAACAACA  
CAGTTTATGATCCTTTGCAACCTGAATTAGACTCATTCAAGGAGGAGTTAGATAAAT  
ATTTTAAGAATCATAACATCACCAGATGTTGATTTAGGTGACATCTCTGGCATTAAATG  
CTTCAGTTGTAAACATTCAAAAAGAAATTGACCGCCTCAATGAGGTTGCCAAGAATT  
TAAATGAATCTCTCATCGATCTCCAAGAACTTGGAAAGTATGAGCAGTATATAAAAT  
GGCCATGGTACATTTGGCTAGGTTTTATAGCTGGCTTGATTGCCATAGTAATGGTGA  
CAATTATGCTTTGCTGTATGACCAGTTGCTGTAGTTGTCTCAAGGGCTGTTGTTCTT  
GTGGATCCTGCTGCAAATTTGATGAAGACGACTCTGAGCCAGTGCTCAAAGGAGTC  
AAATTACATTACACATAAACGAACTTATGGATTTGTTTATGAGAATCTTCACAATTGG  
AACTGTAACCTTTGAAGCAAGGTGAAATCAAGGATGCTACTCCTTCAGATTTTGTTCG  
CGCTACTGCAACGATACCGATAACAAGCCTCACTCCCTTTCGGATGGCTTATTGTTGG  
CGTTGCACTTCTTGCTGTTTTTTCAGAGCGCTTCCAAAATCATAACCCTCAAAAAGAG  
ATGGCAACTAGCACTCTCCAAGGGTGTTCACCTTTGTTTGAACCTTGCTGTTGTTGTT



**TGTAACAGTTTACTCACACCTTTTGCTCGTTGCTGCTGGCCTTGAAGCCCCTTTTCTC  
TATCTTTATGCTTTAGTCTACTTCTTGCAGAGTATAAACTTTGTAAGAATAATAATGA  
GGCTTTGGCTTTGCTGGAAATGCCGTTCCAAAAACCCATTACTTTATGATGCCAACT  
ATTTTCTTTGCTGGCATACTAATTGTTACGACTATTGTATACCTTACAATAGTGTAAC  
TTCTTCAATTGTCATTACTTCAGGTGATGGCACAACAAGTCCTATTTCTGAACATGAC  
CCGGG**

Underline: *SmaI*

Bold: SARS-CoV-2, position 22975 – 25940

Fragment 11

CCCGGGATGGCAACTAGCACTCTCCAAGGGTGTTCACCTTTGTTTGCAACTTGCTGTT  
GTTGTTTGTAACAGTTTACTCACACCTTTTGCTCGTTGCTGCTGGCCTTGAAGCCCC  
TTTTCTCTATCTTTATGCTTTAGTCTACTTCTTGCAGAGTATAAACTTTGTAAGAATA  
ATAATGAGGCTTTGGCTTTGCTGGAAATGCCGTTCCAAAAACCCATTACTTTATGAT  
GCCAACTATTTTCTTTGCTGGCATACTAATTGTTACGACTATTGTATACCTTACAATA  
GTGTAACCTTCTTCAATTGTCATTACTTCAGGTGATGGCACAACAAGTCCTATTTCTG  
AACATGACTACCAGATTGGTGGTTATACTGAAAAATGGGAATCTGGAGTAAAAGACT  
GTGTTGTATTACACAGTTACTTCACTTCAGACTATTACCAGCTGTACTCAACTCAATT  
GAGTACAGACACTGGTGTGGAACATGTTACCTTCTTCATCTACAATAAAATTGTTGA  
TGAGCCTGAAGAACATGTCCAAATTCACACAATCGACGGTTCATCCGGAGTTGTTAA  
TCCAGTAATGGAACCAATTTATGATGAACCGACGACGACTACTAGCGTGCCTTTGTA  
AGCACAAGCTGATGAGTACGAACCTTATGTACTCATTTCGTTTCGGAAGAGACAGGTAC  
GTTAATAGTTAATAGCGTACTTCTTTTTCTTGCTTTCGTGGTATTCTTGCTAGTTACA  
CTAGCCATCCTTACTGCGCTTCGATTGTGTGCGTACTGCTGCAATATTGTTAACGTG  
AGTCTTGTA AAAACCTTCTTTTTACGTTTACTCTCGTGTTAAAAATCTGAATCTTCTA  
GAGTTCCTGATCTTCTGGTCTAAACGAACTAAATATTATATTAGTTTTTCTGTTTGG  
ACTTTAATTTTAGCCATGGCAGATTCCAACGGTACTATTACCGTTGAAGAGCTTAAA  
AAGCTCCTTGAACAATGGAACCTAGTAATAGGTTTCCTATTCTTACATGGATTTGT  
CTTCTACAATTTGCCTATGCCAACAGGAATAGGTTTTTGTATATAATTAAGTTAATTT  
TCCTCTGGCTGTTATGGCCAGTAACTTTAGCTTGTTTTGTGCTTGCTGCTGTTTACA  
GAATAAATTGGATCACCGGTGGAATTGCTATCGCAATGGCTTGTCTTGTAGGCTTGA  
TGTGGCTCAGCTACTTCATTGCTTCTTTCAGACTGTTTGCGCGTACGCGTTCCATGT  
GGTCATTCAATCCAGAACTAACATTCTTCTCAACGTGCCACTCCATGGCACTATTC  
TGACCAGACCGCTTCTAGAAAGTGAACCTCGTAATCGGAGCTGTGATCCTTCGTGGAC  
ATCTTCGTATTGCTGGACACCATCTAGGACGCTGTGACATCAAGGACCTGCCTAAAG  
AAATCACTGTTGCTACATCACGAACGCTTCTTATTACAAATTGGGAGCTTCGCAGC  
GTGTAGCAGGTGACTCAGGTTTTGCTGCATACAGTCGCTACAGGATTGGCAACTATA  
AATTAACACAGACCATTCCAGTAGCAGTGACAATATTGCTTTGCTTGTACAGTAAG  
TGACAACAGATGTTTCATCTCGTTGACTTTCAGGTTACTATAGCAGAGATATTACTA  
ATTATTATGAGGACTTTTTAAAGTTTCCATTTGGAATCTTGATTACATCATAAACCTCA  
TAATTA AAAATTTATCTAAGTCACTAACTGAGAATAAATATTCTCAATTAGATGAAGA  
GCAACCAATGGAGATTGATTAACGAACATGAAAATTATTCTTTTTCTTGGCACTGAT  
AACACTCGCTACTTGTGAGCTTTATCACTACCAAGAGTGTGTTAGAGGTACAACAGT  
ACTTTTAAAAGAACCTTGCTCTTCTGGAACATACGAGGGCAATTCACCATTTTCATCC  
TCTAGCTGATAACAAATTTGCACTGACTTGCTTTAGCACTCAATTTGCTTTTGCTTGT  
CCTGACGGCGTAAAACACGTCTATCAGTTACGTGCCAGATCAGTTTCACCTAAACTG  
TTCATCAGACAAGAGGAAGTTCAAGA ACTTTACTCTCCAATTTTTCTTATTGTTGCG  
GCAATAGTGTTTATAACACTTTGCTTCACACTCAAAGAAAGACAGAATGATTGAAC  
TTTCATTAATTGACTTCTATTTGTGCTTTTTAGCCTTTCTGCTATTTCCTTGTTTTAATT  
ATGCTTATTATCTTTTGGTTCTCACTTGAACCTGCAAGATCATAATGAACTTGTACAG  
CCTAAACGAACATGAAATTTCTTGTTTTCTTAGGAATCATCACA ACTGTAGCTGCATT  
TCACCAAGAATGTAGTTTACAGTCATGTACTCAACATCAACCATATGTAGTTGATGA  
CCCGTGTCCATTCACTTCTATTCTAAATGGTATATTAGAGTAGGAGCTAGAAAATC  
AGCACCTTTAATTGAATTGTGCGTGGATGAGGCTGGTTCTAAATCACCCATTAGTA  
CATCGATATCGGTAATTATACAGTTTCTGTTTACCTTTTACAATTAATTGCCAGGAA  
CCTAAATTGGGTAGTCTTGTAGTGCGTTGTTTCGTTCTATGAAGACTTTTTAGAGTAT  
CATGACGTTTCGTGTTGTTTTAGATTTTCATCTAAACGAACAACTAAAATGTCTGATA

**ATGGACCCCAAATCAGCGAAATGCACCCCGCATTACGTTTGGTGGACCCTCAGATT  
CAACTGGCAGTAACCAGAATGGAGAACGCAGTGGGGCGCGATCAAAACAACGTCGG  
CCCAAGGTTTACCCAATAATACTGCGTCTTGGTTCACCGCTCTCACTCAACATGGC  
AAGGAAGACCTTAAATTCCTCGAGGACAAGGCGTTCCAATTAACACCAATAGCAGT  
CCAGATGACCAAATTGGCTACTACCGAAGAGCTACCAGACGAATTCGTGGTGGTGA  
CGGTAAAATGAAAGATCTCAGTCCAAGATGGTATTTCTACTACCTAGGAACTGGGCC  
AGAAGCTGGACTTCCCTATGGTGCTAACAAAGACGGCATCATATGGGTTGCAACTG  
AGGGAGCCTTGAATACACCAAAGATCACATTGGCACCCGCAATCCTGCTAACAATG  
CTGCAATCGTGCTACAACCTCCTCAAGGAACAACATTGCCAAACCCGGG**

Underline: *SmaI*

Bold: SARS-CoV-2, position 25595 – 28779

Fragment 12

CCCGGGATGTCTGATAATGGACCCCAAATCAGCGAAATGCACCCCGCATTACGTTT  
GGTGGACCCTCAGATTCAACTGGCAGTAACCAGAATGGAGAACGCAGTGGGGCGCG  
ATCAAAACAACGTCGGCCCCAAGGTTTACCCAATAATACTGCGTCTTGGTTCACCGC  
TCTCACTCAACATGGCAAGGAAGACCTTAAATTCCTCGAGGACAAGGCGTTCCAAT  
TAACACCAATAGCAGTCCAGATGACCAAATTGGTACTACCGAAGAGCTACCAGAC  
GAATTCGTGGTGGTGACGGTAAAATGAAAGATCTCAGTCCAAGATGGTATTTCTACT  
ACCTAGGAACTGGGCCAGAAGCTGGACTTCCCTATGGTGCTAACAAAGACGGC  
ATATGGGTTGCAACTGAGGGAGCCTTGAATACACCAAAGATCACATTGGCACCCG  
CAATCCTGCTAACAAATGCTGCAATCGTGCTACAACCTCCTCAAGGAACAACATTGCC  
AAAAGGCTTCTACGCAGAAGGGAGCAGAGGGCGGCAGTCAAGCCTCTTCTCGTTCT  
CATCACGTAGTCGCAACAGTTCAAGAAATTCAACTCCAGGCAGCAGTAGGGGAACT  
TCTCCTGCTAGAATGGCTGGCAATGGCGGTGATGCTGCTCTTGCTTTGCTGCTGCTT  
GACAGATTGAACCAGCTTGAGAGCAAAATGTCTGGTAAAGGCCAACAAACAACAAGG  
CCAACTGTCACTAAGAAATCTGCTGCTGAGGCTTCTAAGAAGCCTCGGCCAAAACG  
TACTGCCACTAAAGCATAACAATGTAACACAAGCTTTCGGCAGACGTGGTCCAGAACA  
AACCCAAGGAAATTTTGGGGACCAGGAACTAATCAGACAAGGAACTGATTACAAAC  
ATTGGCCGCAAATTGCACAATTTGCCCCAGCGCTTCAGCGTTCTTCGGAATGTCGC  
GCATTGGCATGGAAGTCACACCTTCGGGAACGTGGTTGACCTACACAGGTGCCATC  
AAATTGGATGACAAAGATCCAAATTCAAAGATCAAGTCATTTTGTGAATAAGCAT  
ATTGACGCATAAAAACATTCCCACCAACAGAGCCTAAAAAGGACAAAAAGAAGAA  
GGCTGATGAACTCAAGCCTTACCGCAGAGACAGAAGAAACAGCAAACCTGTGACTC  
TTCTTCCTGCTGCAGATTTGGATGATTTCTCAAACAATTGCAACAATCCATGAGCA  
GTGCTGACTCAACTCAGGCCTAAACTCATGCAGACCACACAAGGCAGATGGGCTAT  
ATAAACGTTTTTCGCTTTTCCGTTTACGATATATAGTCTACTCTTGTGCAGAATGAATT  
CTCGTAACTACATAGCACAAAGTAGATGTAGTTAACTTTAATCTCACATAGCAATCTTT  
AATCAGTGTGTAACATTAGGGAGGACTTGAAAGAGCCACCACATTTTCACCGAGGC  
CACGCGGAGTACGATCGAGTGTACAGTGAAC  
AATGCTAGGGAGAGCTGCCTATATGGAAGAGCCCTAATGTGTAAAATTAATTTTAGT  
AGTGCTATCCCATGTGATTTTAATAGCTTCTTAGGAGAATGACaaaaaaaaaaaaaaaaaaaa  
aaaaaaaaCGGCCGggcgcatggteccagctctctgctggcgcggetgggcaacattccgaggggaccgtccctcggtatggc  
gaatgggacgggcctgcgatcgcgacgaggatctagatctctagagtcgacctgcagcatgcaagcttgattctatagtctcac  
ctaaatagcttgCCCGGG

Underline: *Sma*I

Bold: SARS-CoV-2, position 28274 – 29870

Lowercase: poly(A) tail

Underline, bold, italic: *Eag*I

Lowercase, bold: Hepatitis D virus ribozyme and pCC1 sequences

## Modification of SARS-CoV-2 synthetic fragment 11 to introduce TurboGFP transgene

Fragment 13

**GATGGCAACTAGCACTCTCCAAGGGTGTTCAC****TTTGTTTGCAACTTGCTGTTGTTGTTT**  
**GTAACAGTTTACTCACACCTTTTGCTCGTTGCTGCTGGCCTTGAAGCCCCTTTTCTCT**  
**ATCTTTATGCTTTAGTCTACTTCTTGCAGAGTATAAACTTTGTAAGAATAAATGAG**  
**GCTTTGGCTTTGCTGGAAATGCCGTTCCAAAAACCCATTACTTTATGATGCCAACTA**  
**TTTTCTTTGCTGGCATACTAATTGTTACGACTATTGTATACCTTACAATAGTGTAAC**  
**TCTTCAATTGTCATTACTTCAGGTGATGGCACAACAAGTCCTATTTCTGAACATGAC**  
**TACCAGATTGGTGGTTATACTGAAAAATGGGAATCTGGAGTAAAAGACTGTGTTGTA**  
**TTACACAGTTACTTCACTTCAGACTATTACCAGCTGTACTCAACTCAATTGAGTACA**  
**GACACTGGTGTGTAACATGTTACCTTCTTCATCTACAATAAAATTGTTGATGAGCCT**  
**GAAGAACATGTCCAAATTCACACAATCGACGGTTCATCCGGAGTTGTTAATCCAGTA**  
**ATGGAACCAATTTATGATGAACCGACGACGACTACTAGCGTGCCTTTGTAAGCACAA**  
**GCTGATGAGTACGAACTTATGTACTCATTTCGTTTCGGAAGAGACAGGTACGTTAATA**  
**GTTAATAGCGTACTTCTTTTTCTTGCTTTCGTGGTATTCTTGCTAGTTACACTAGCCA**  
**TCCTTACTGCGCTTCGATTGTGTGCGTACTGCTGCAATATTGTTAACGTGAGTCTTG**  
**TAAAACCTTCTTTTTACGTTTACTCTCGTGTTAAAAATCTGAATTCTTCTAGAGTTCC**  
**TGATCTTCTGGTCTAAACGAACTAAATATTATATTAGTTTTTCTGTTTGGAACTTTAA**  
**TTTTAGCCATGGCAGATTCCAACGGTACTATTACCGTTGAAGAGCTTAAAAAGCTCC**  
**TTGAACAATGGAACCTAGTAATAGGTTTTCTATTCTTACATGGATTTGTCTTCTACA**  
**ATTTGCCTATGCCAACAGGAATAGGTTTTTGTATATAATTAAGTTAATTTTCTCTGG**  
**CTGTTATGGCCAGTAACTTTAGCTTGTTTTGTGCTTGCTGCTGTTTACAGAATAAATT**  
**GGATCACCGGTGGAATTGCTATCGCAATGGCTTGTCTTGTAGGCTTGATGTGGCTCA**  
**GCTACTTCATTGCTTCTTTCAGACTGTTTGC GCGTACGCGTTCCATGTGGTCATTCA**  
**ATCCAGAACTAACATTCTTCTCAACGTGCCACTCCATGGCACTATTCTGACCAGAC**  
**CGCTTCTAGAAAGTGAACCTCGTAATCGGAGCTGTGATCCTTCGTGGACATCTTCGTA**  
**TTGCTGGACACCATCTAGGACGCTGTGACATCAAGGACCTGCCTAAAGAAATCACTG**  
**TTGCTACATCACGAACGCTTTCTTATTACAAATTGGGAGCTTCGCAGCGTGTAGCAG**  
**GTGACTCAGGTTTTGCTGCATACAGTCGCTACAGGATTGGCAACTATAAATTAACA**  
**CAGACCATTCCAGTAGCAGTGACAATATTGCTTTGCTTGTACAGTAAGTGACAACAG**  
**ATGTTTCATCTCGTTGACTTTCAGGTTACTATAGCAGAGATTTACTAATTATTATGA**  
**GGACTTTTAAAGTTTCCATTTGGAATCTTGATTACATCATAAACCTCATAATTAAAAA**  
**TTTATCTAAGTCACTAACTGAGAATAAATATTCTCAATTAGATGAAGAGCAACCAAT**  
**GGAGATTGATTAAACGAACATGAAAATTATTCTTTT****CTTGGCACTGATAA****CACTCGCT****ga**  
gagcgacgagagcggc

Underline, italic: Primer binding site

Lowercase: TurboGFP sequence, added as overhang to generate overlaps with fragment 14

Bold, with/without underline and italic: SARS-CoV-2, position 25595 - 27432

Fragment 14 containing TurboGFP gene

ttattctttcttggcaactgataaacactcgcct***GAGAGCGACGAGAGCGGCCTGCCCGCCATGGAGATCGAGT***  
***GCCGCATCACCGGCACCCTGAACGGCGTGGAGTTCGAGCTGGTGGGCGGCGGAGA***  
***GGGCACCCCCGAGCAGGGCCGCATGACCAACAAGATGAAGAGCACCAAAGGCGCC***  
***CTGACCTTCAGCCCCTACCTGCTGAGCCACGTGATGGGCTACGGCTTCTACCACTTC***  
***GGCACCTACCCCAGCGGCTACGAGAACCCCTTCCTGCACGCCATCAACAACGGCGG***  
***CTACACCAACACCCGCATCGAGAAGTACGAGGACGGCGGCGTGCTGCACGTGAGCT***  
***TCAGCTACCGCTACGAGGCCGGCCGCGTGATCGGGCGACTTCAAGGTGATGGGCACC***  
***GGCTTCCCCGAGGACAGCGTGATCTTCACCGACAAGATCATCCGCAGCAACGCCAC***  
***CGTGGAGCACCTGCACCCCATGGGCGATAACGATCTGGATGGCAGCTTCACCCGCA***  
***CCTTCAGCCTGCGCGACGGCGGCTACTACAGCTCCGTGGTGGACAGCCACATGCAC***  
***TTCAAGAGCGCCATCCACCCAGCATCCTGCAGAACGGGGGCCCCATGTTTCGCCTT***  
***CCGCCGCGTGGAGGAGGATCACAGCAACACCGAGCTGGGCATCGTGGAGTACCAGC***  
***ACGCCTTCAAGACCCCG******GATGCAGATGCCGGTGAAGAAT***aactttactctccaattttcttattgttgc

Underline italic: Primer binding site

Lowercase at the 5' end: SARS-CoV-2, position 28108 – 28130 added as overhang to generate overlaps with fragment 13

Lowercase at the 3' end: SARS-CoV-2, position 28108 – 28130 added as overhang to generate overlaps with fragment 15

Bold, with/without underline and italic: TurboGFP

Fragment 15

gcagatgccggtgaagaataaact**TTACTCTCCAATTTTCTTATTGTTGCGGCAATAGTGTTTATAACA**  
**CTTTGCTTCACACTCAAAAAGAAAGACAGAATGATTGAACTTTCATTAATTGACTTCTA**  
**TTTGTGCTTTTTAGCCTTTCTGCTATTCCTTGTTTTAATTATGCTTATTATCTTTTGGT**  
**TCTCACTTGAAGTGAAGATCATAATGAACTTGTACAGCCTAAACGAACATGAAAT**  
**TTCTTGTTTTCTTAGGAATCATCACAACCTGTAGCTGCATTTACCAAGAATGTAGTTT**  
**ACAGTCATGTACTCAACATCAACCATATGTAGTTGATGACCCGTGTCCTATTCACTT**  
**CTATTCTAAATGGTATATTAGAGTAGGAGCTAGAAAATCAGCACCTTTAATTGAATT**  
**GTGCGTGGATGAGGCTGGTTCTAAATCACCCATTCAGTACATCGATATCGGTAATTA**  
**TACAGTTTCCTGTTTACCTTTTACAATTAATTGCCAGGAACCTAAATTGGGTTAGTCTT**  
**GTAGTGC GTTGTTCGTTCTATGAAGACTTTTTAGAGTATCATGACGTTTCGTGTTGTT**  
**TTAGATTTTTCATCTAAACGAACAACTAAAATGTCTGATAATGGACCCCAAAATCAGC**  
**GAAATGCACCCCGCATTACGTTTGGTGGACCCTCAGATTCAACTGGCAGTAACCAGA**  
**ATGGAGAACGCAGTGGGGCGCGATCAAAACAACGTCGGCCCCAAGGTTTACCCAAT**  
**AATACTGCGTCTTGGTTCACCGCTCTCACTCAACATGGCAAGGAAGACCTTAAATTC**  
**CCTCGAGGACAAGGCGTTCCAATTAACACCAATAGCAGTCCAGATGACCAAATTGG**  
**CTACTACCGAAGAGCTACCAGACGAATTCGTGGTGGTGACGGTAAAATGAAAGATC**  
**TCAGTCCAAGATGGTATTTCTACTACCTAGGAACTGGGCCAGAAGCTGGACTTCCCT**  
**ATGGTGCTAACAAAGACGGCATCATATGGGTTGCAACTGAGGGAGCCTTGAATACA**  
**CCAAAAGATCACATTGGCACCCGCAATCCTGCTAACAAATGCTGCAATCGTGCTACAA**  
**CTTCCTCAAGGAACAACATTGCCAAA**

Underline italic: Primer binding site

Lowercase: TurboGFP, added as overhang to generate overlaps with fragment 14

Bold, with/without underline and italic: SARS-CoV-2, position 28128 – 29229
