# Supplementary figures and images for: Rapid reconstruction of SARS-CoV-2 using a synthetic genomics platform
Source: Springer Nature journal article supplement (doi:10.1038/s41586-020-2294-9), 2020-05-04

**a**

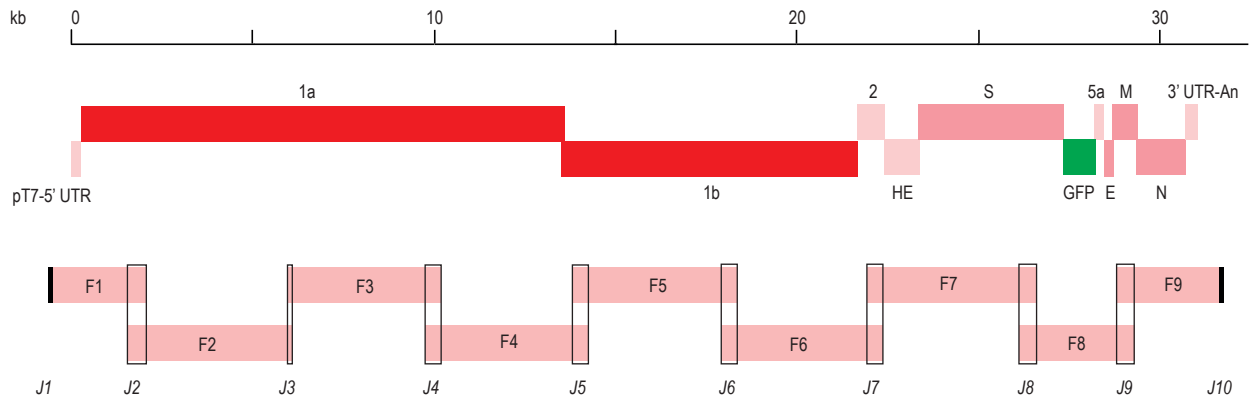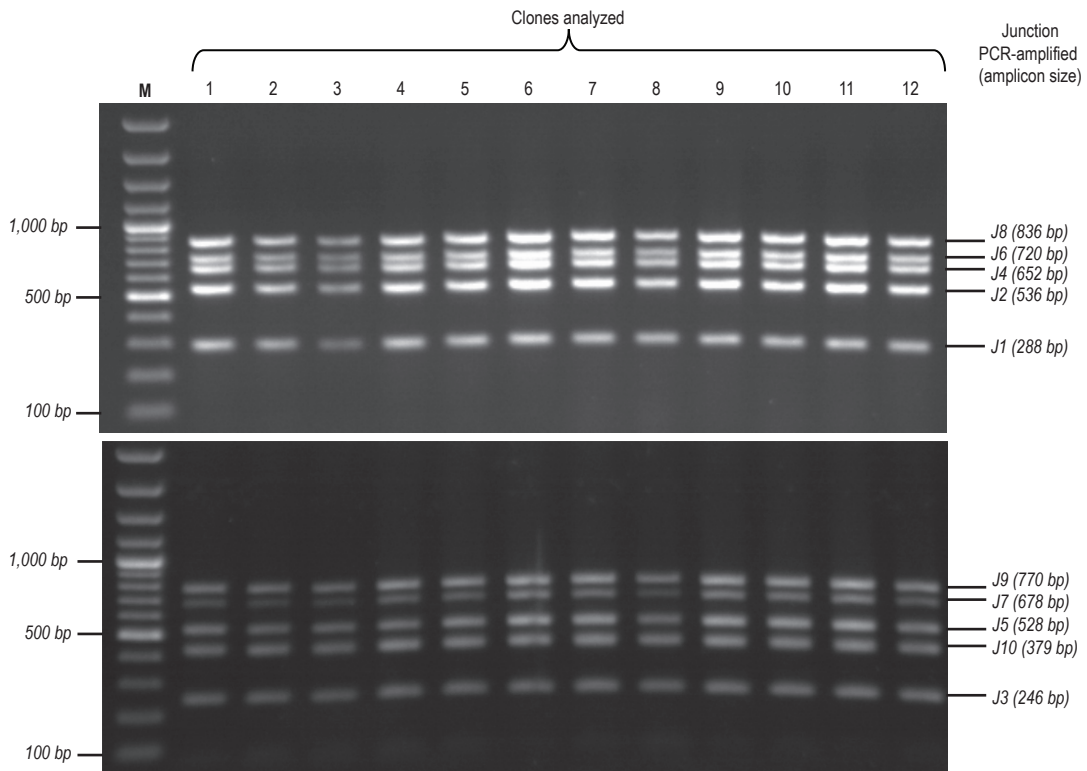

**b**

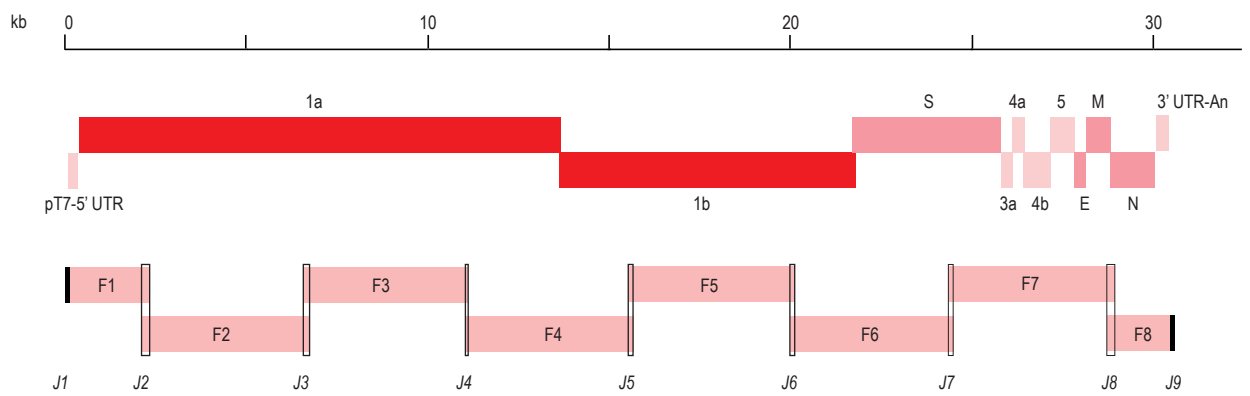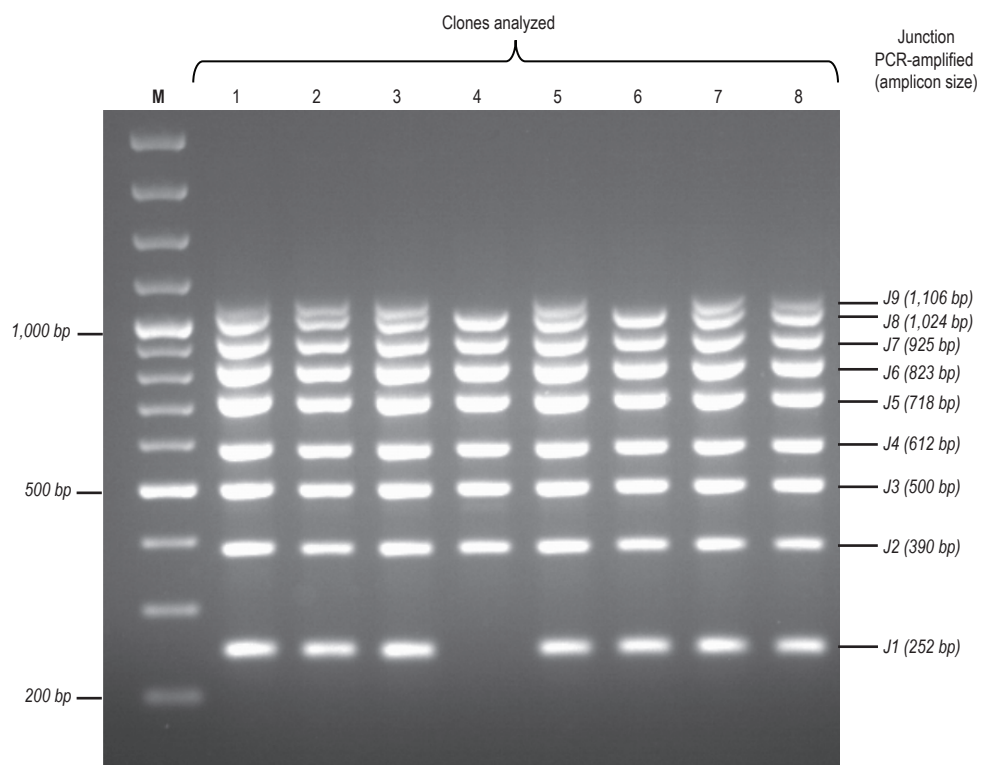

**c**

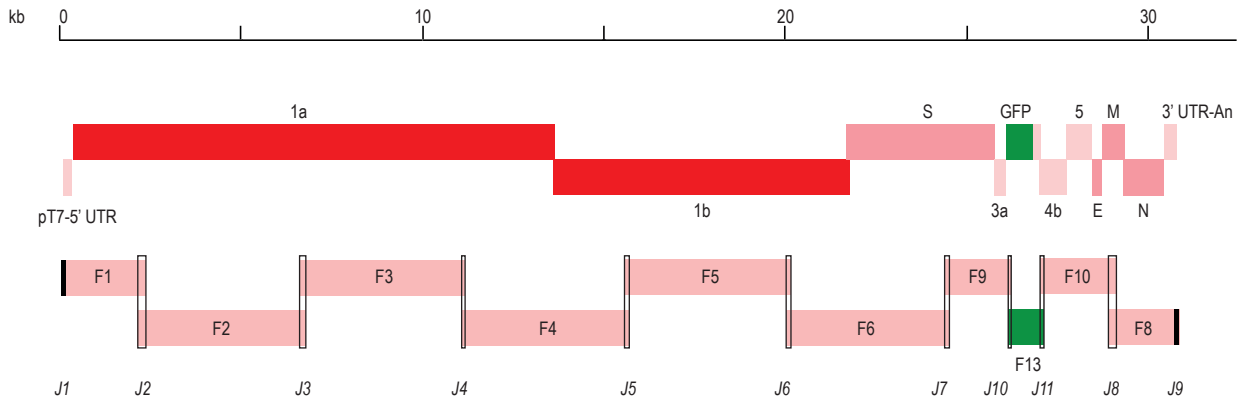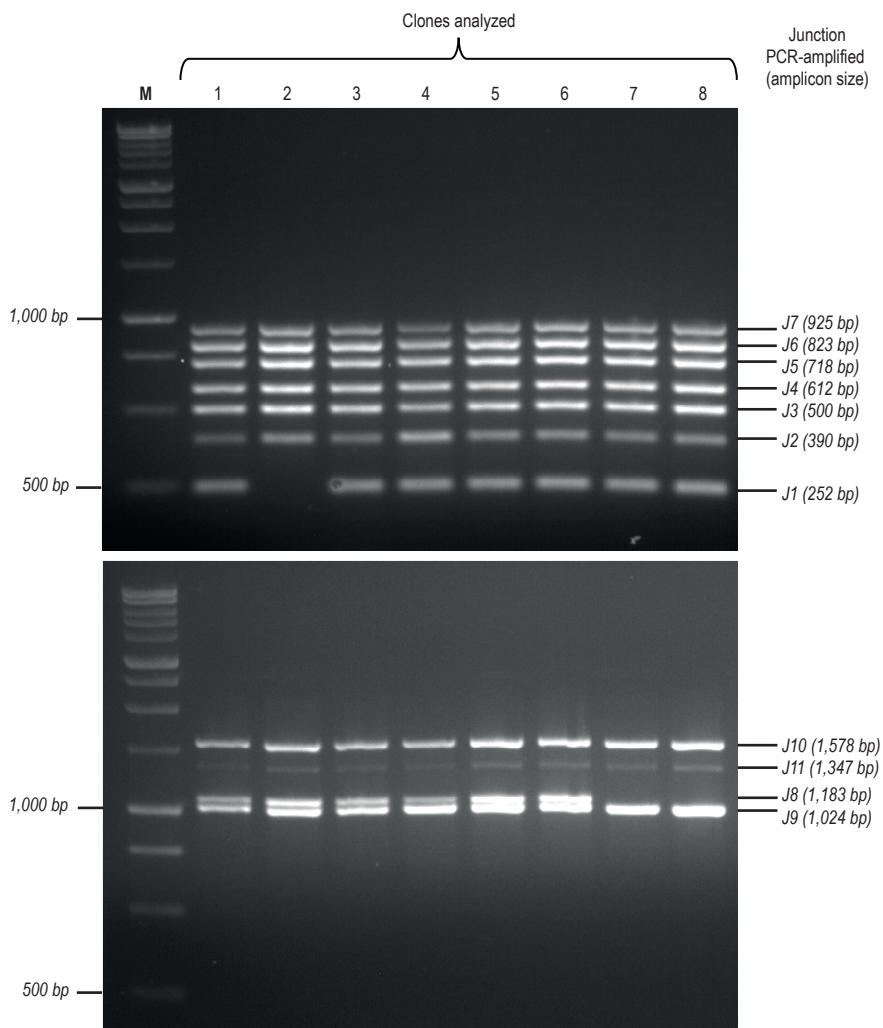

**d**

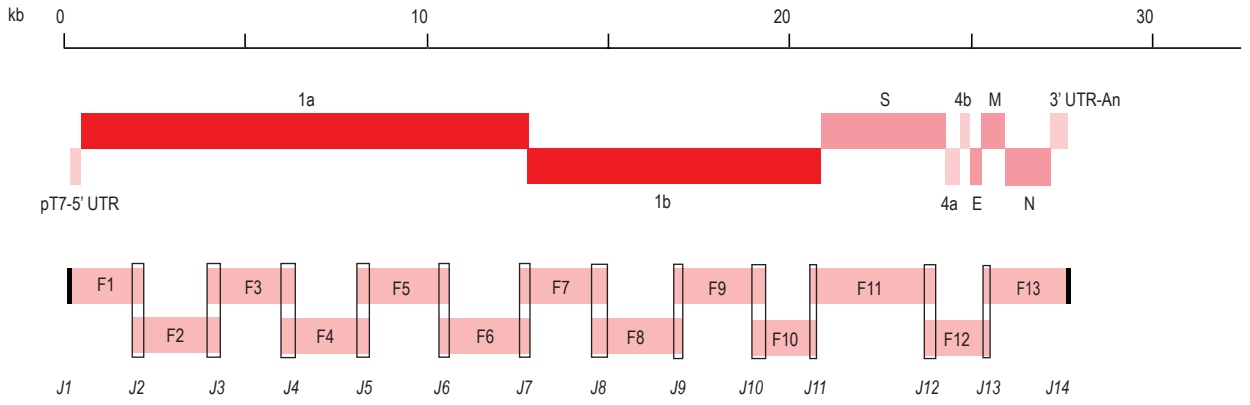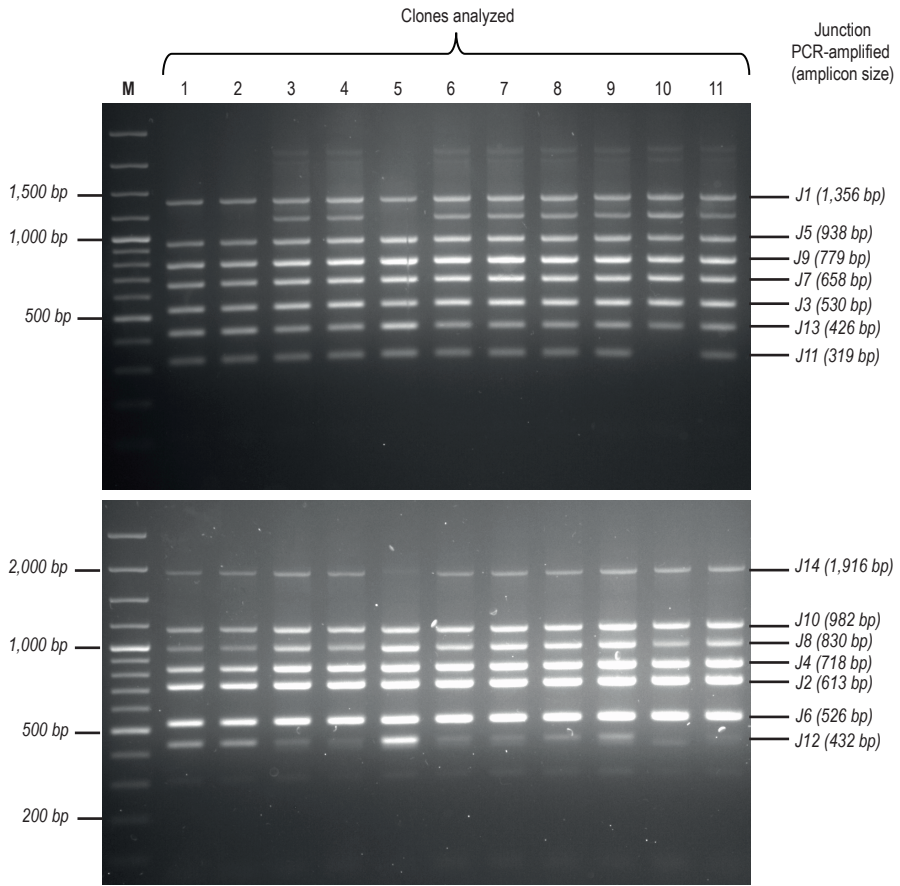

e

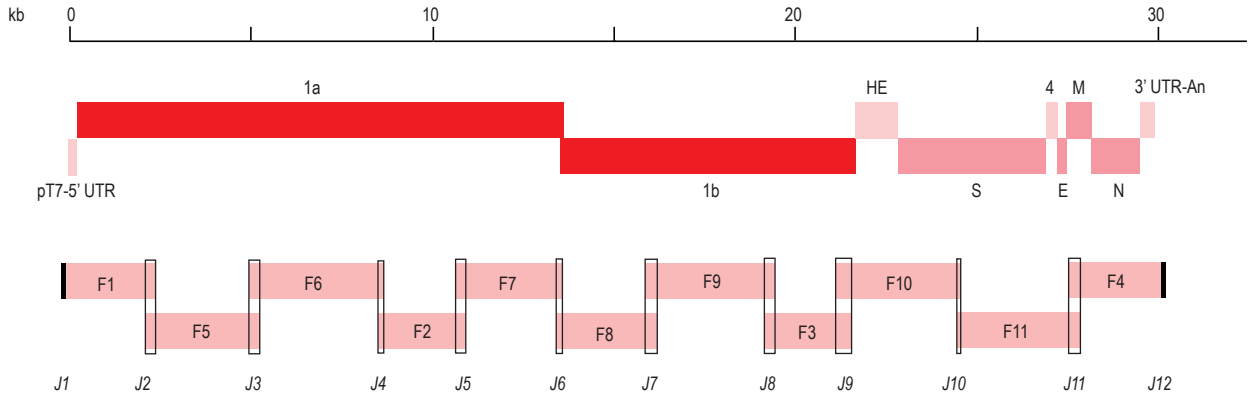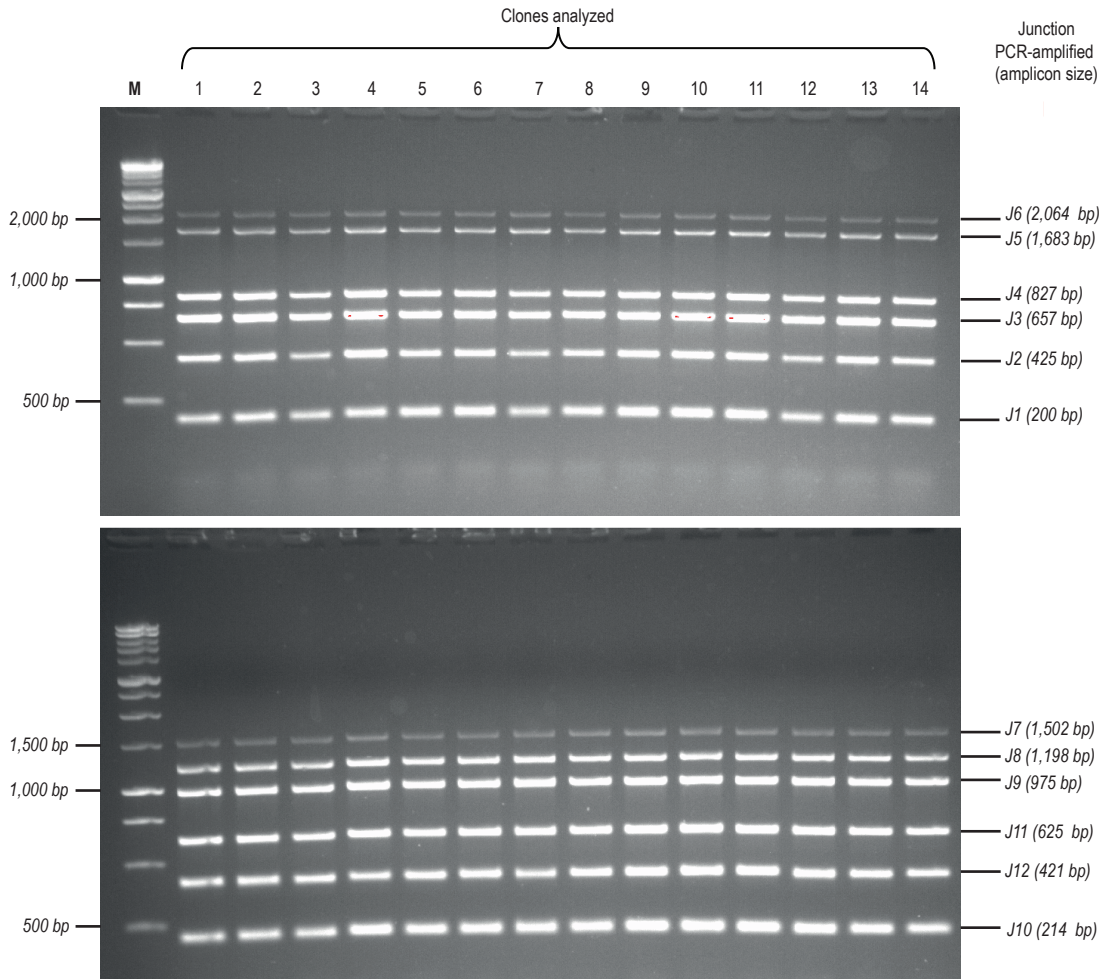

f

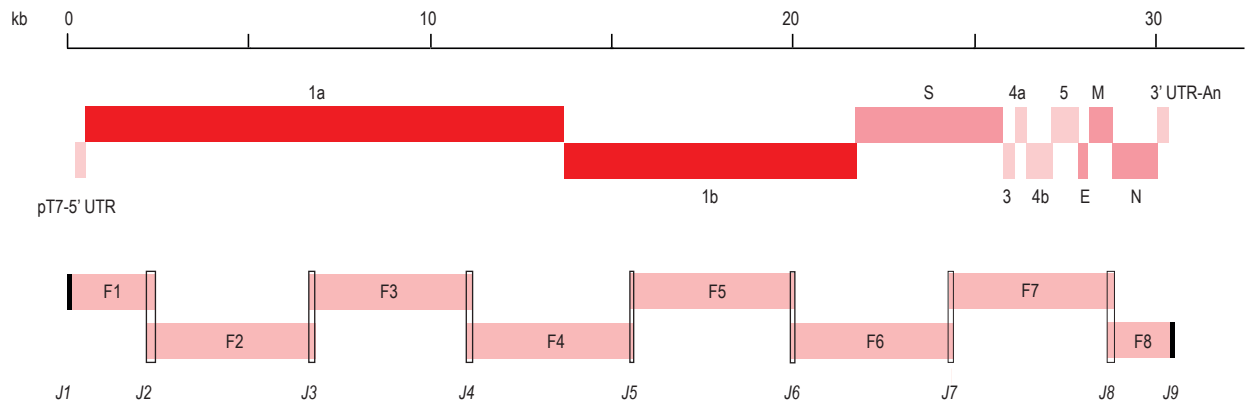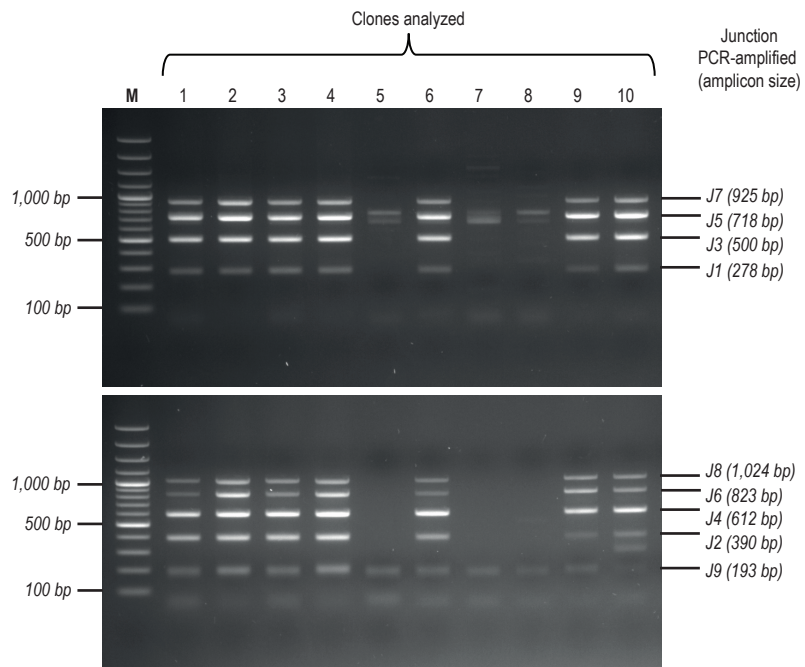

**g**

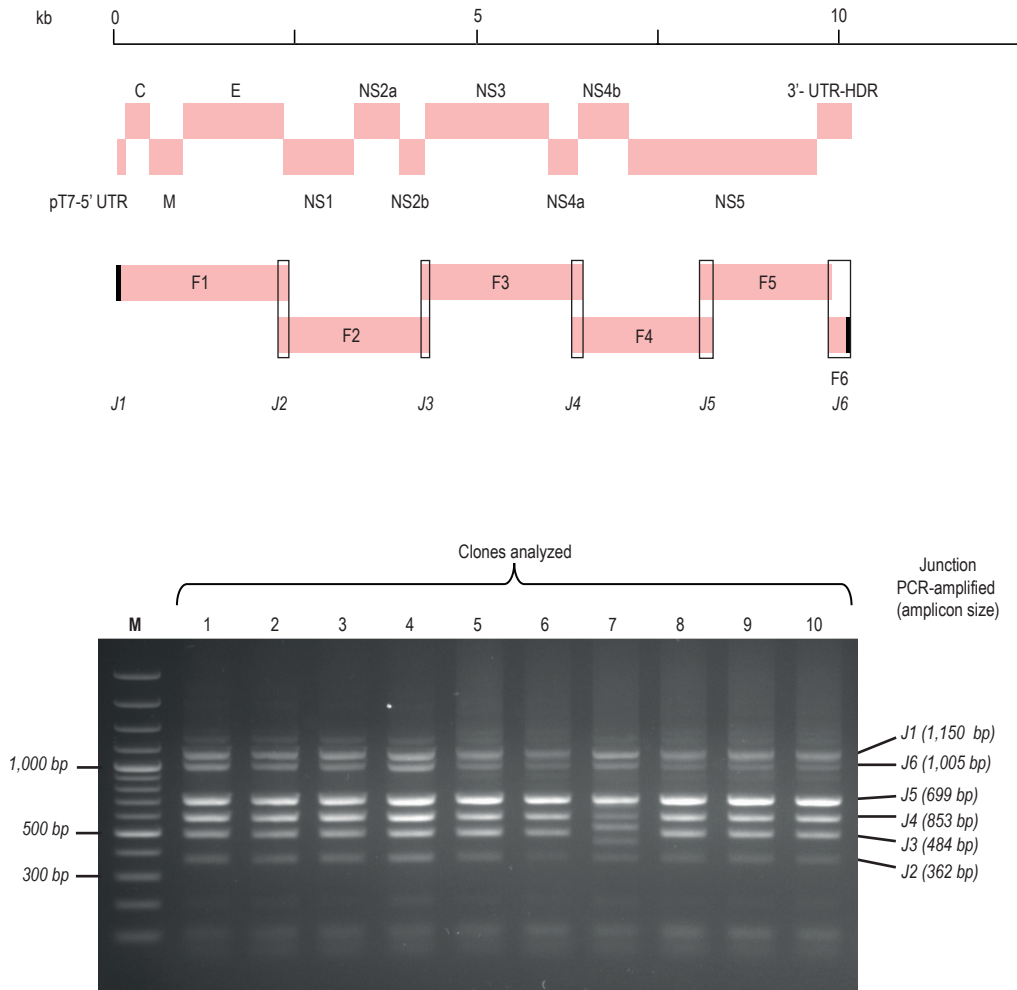

**h**

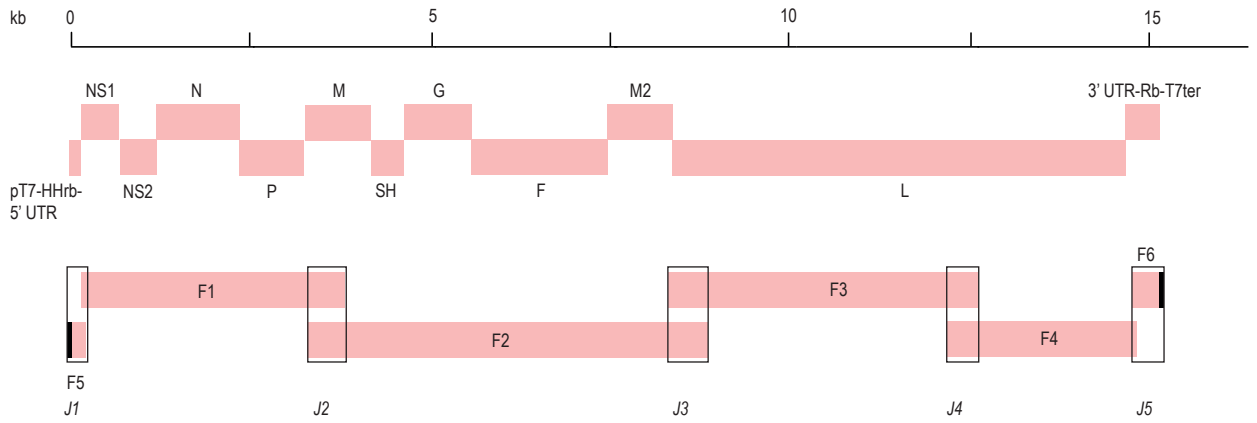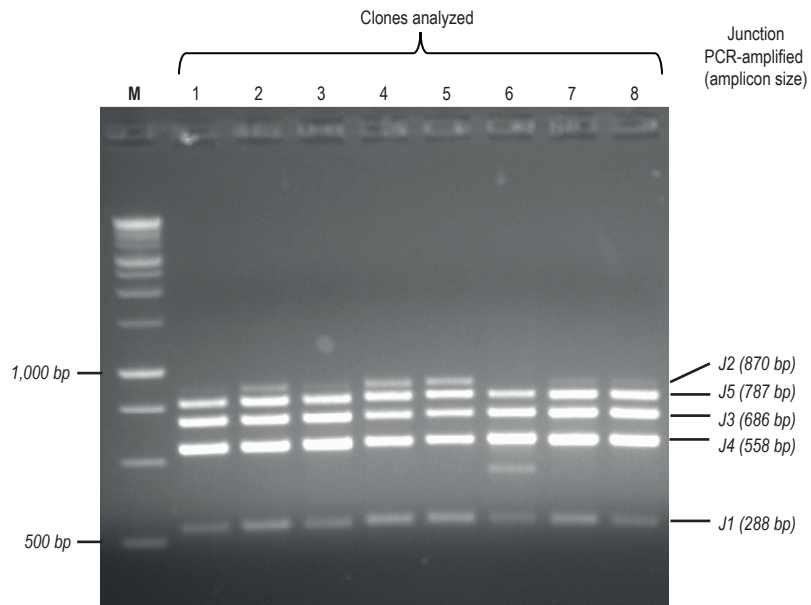



i

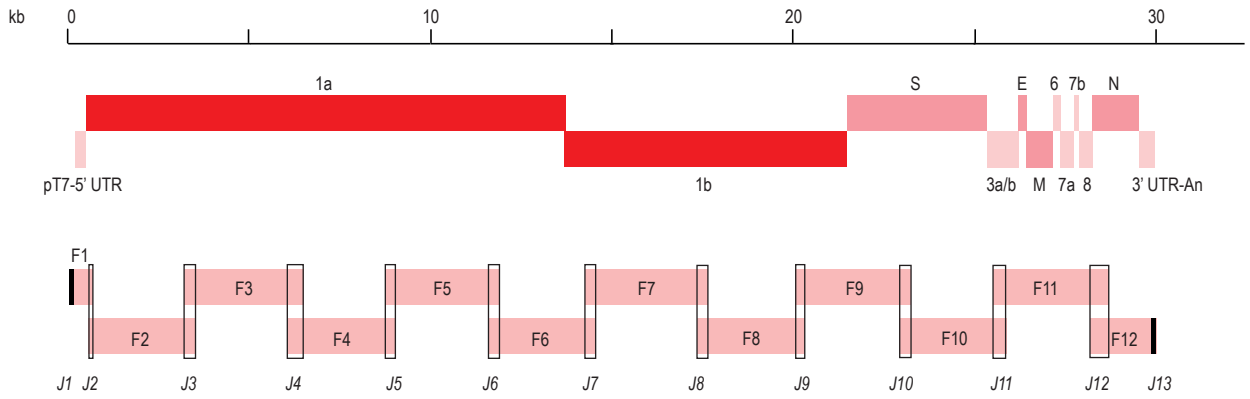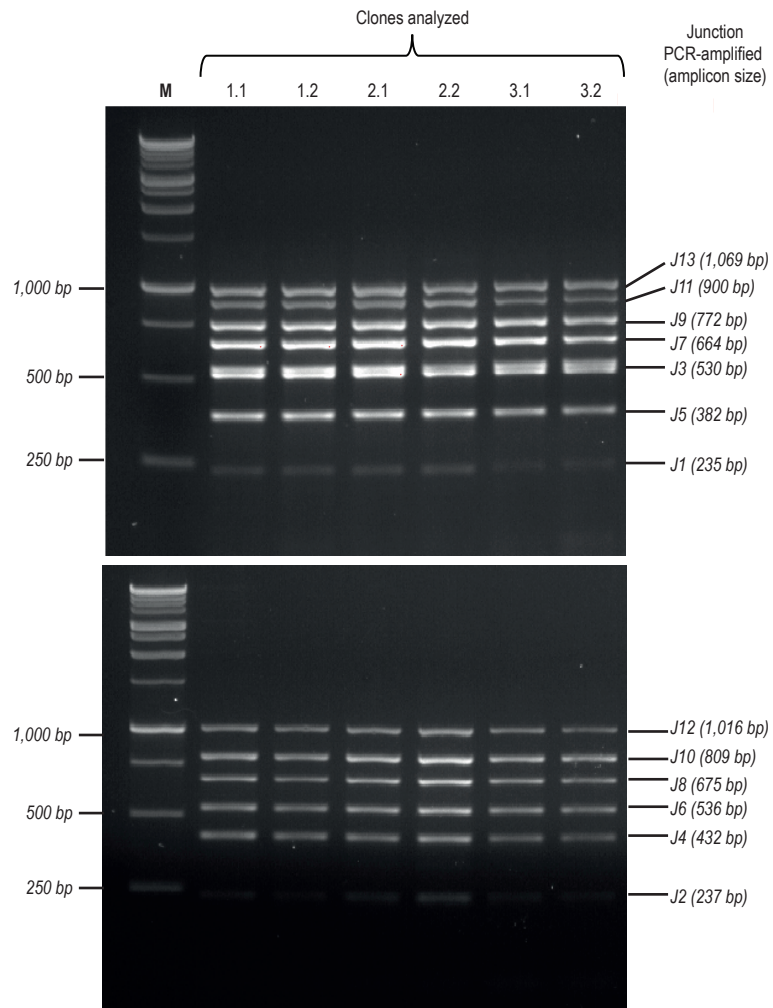

j

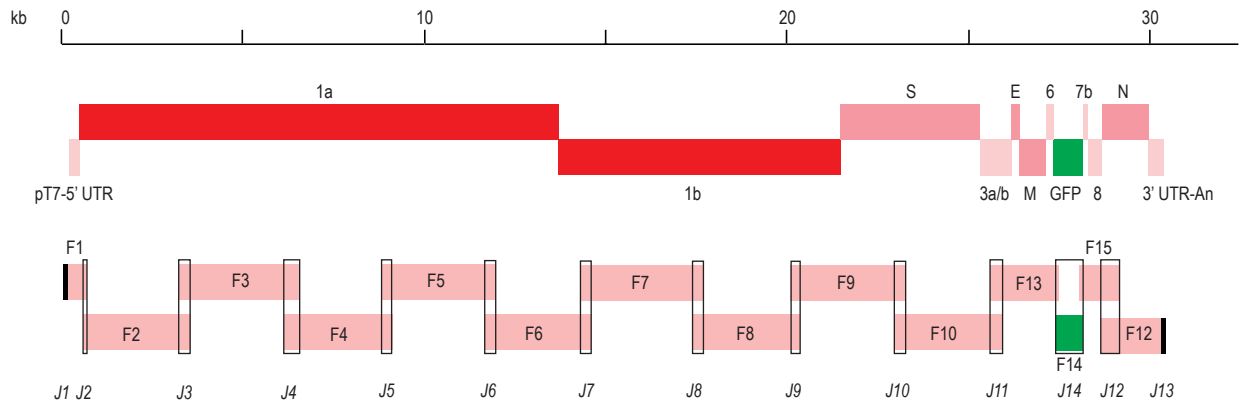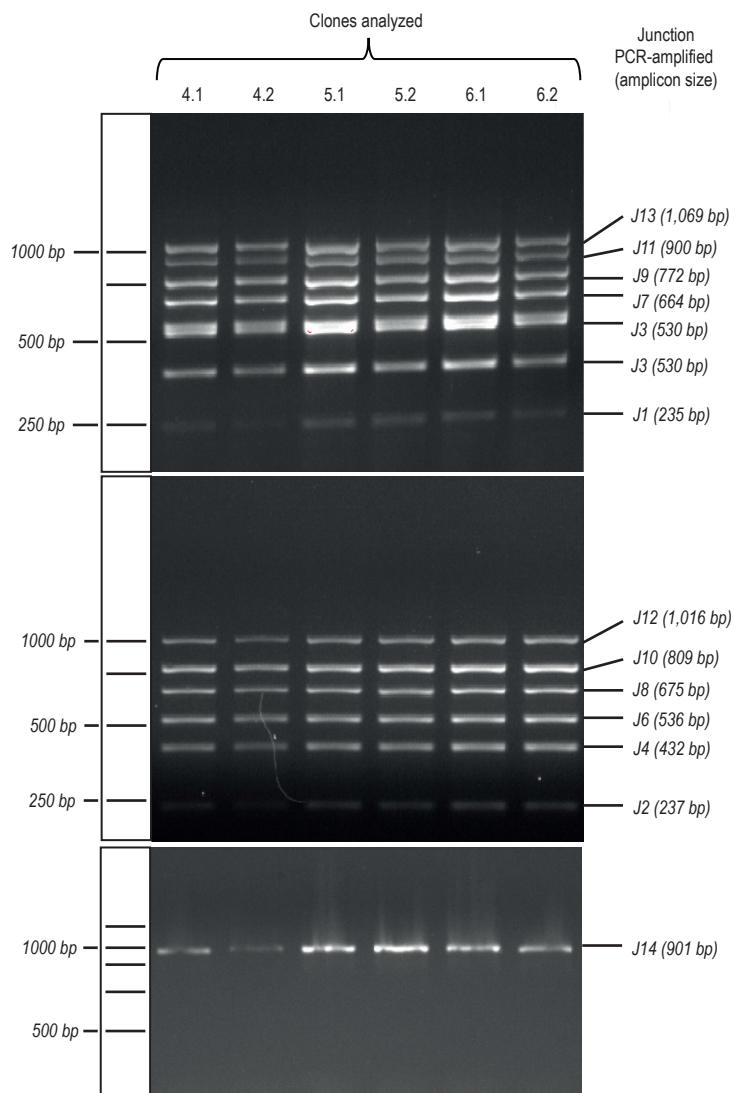

Supplement: 41586_2020_2294_MOESM3_ESM.pdf [file 41586_2020_2294_MOESM3_ESM.pdf]
